1     Motor patterning, ion regulation and Spreading Depolarization during  
2     CNS shutdown induced by experimental anoxia in *Locusta migratoria*.

3

4                     R. Meldrum Robertson and Rachel A. Van Dusen

5

6                     Department of Biology, Queen's University, Kingston, ON. Canada.

7

8     Email address: [robertrm@queensu.ca](mailto:robertrm@queensu.ca)

9

10 **Abbreviations:**

11

12 AICAR – 5-aminoimidazole-4-carboxamide ribonucleoside

13 AMPK – AMP-activated protein kinase

14 BBB – blood brain barrier

15 EMG - electromyographic

16 MTG – metathoracic ganglion

17 NKA – Na<sup>+</sup>/K<sup>+</sup>-ATPase

18 PAN – postanoxic negativity

19 pH<sub>o</sub> – interstitial pH of the ganglion

20 P<sub>O<sub>2</sub></sub> – partial pressure of oxygen

21 SD – spreading depolarization

22 TPP – transperineurial potential

23 V<sub>i</sub> – intracellular potential relative to the bathing saline

24 V<sub>m</sub> – membrane potential = (V<sub>i</sub>-V<sub>o</sub>)

25 V<sub>o</sub> – extracellular potential relative to the bathing saline

26 VA – vacuolar-type (V)-ATPase

27

28

29

30

31 **Abstract**

32 Anoxia induces a reversible coma in insects. Coma onset is triggered by the arrest of  
33 mechanisms responsible for maintaining membrane ion homeostasis in the CNS, resulting in a  
34 wave of neuronal and glial depolarization known as spreading depolarization (SD). Different  
35 methods of anoxia influence the behavioural response but their effects on SD are unknown. We  
36 investigated the effects of CO<sub>2</sub>, N<sub>2</sub>, and H<sub>2</sub>O on the characteristics of coma induction and  
37 recovery in *Locusta migratoria*. Water immersion delayed coma onset and recovery, likely due  
38 to involvement of the tracheal system and the nature of asphyxiation but otherwise resembled N<sub>2</sub>  
39 delivery. The main difference between N<sub>2</sub> and CO<sub>2</sub> was that CO<sub>2</sub> hastened onset of neural failure  
40 and SD and delayed recovery. In the CNS, this was associated with CO<sub>2</sub> inducing an abrupt and  
41 immediate decrease of interstitial pH and increase of extracellular [K<sup>+</sup>]. Recording of the  
42 transperineurial potential showed that SD propagation and a postanoxic negativity (PAN) were  
43 similar with both gases. The PAN increased with ouabain treatment, likely due to removal of the  
44 counteracting electrogenic effect of Na<sup>+</sup>/K<sup>+</sup>-ATPase, and was inhibited by bafilomycin, a proton  
45 pump inhibitor, suggesting that it was generated by the electrogenic effect of a Vacuolar-type  
46 ATPase (VA). Muscle fibres depolarized by ~20 mV, which happened more rapidly with CO<sub>2</sub>  
47 compared with N<sub>2</sub>. Wing muscle motoneurons depolarized nearly completely in two stages, with  
48 CO<sub>2</sub> causing more rapid onset and slower recovery than N<sub>2</sub>. Other parameters of SD onset and  
49 recovery were similar with the two gases. Electrical resistance across the ganglion sheath  
50 increased during anoxia and at SD onset. We provisionally attribute this to cell swelling reducing  
51 the dimensions of the interstitial pathway from neuropil to the bathing saline. Neuronal  
52 membrane resistance decreased abruptly at SD onset indicating opening of an unidentified  
53 membrane conductance. Consideration of the intracellular recording relative to the saline  
54 suggests that the apical membrane of perineurial glia depolarizes prior to neuron depolarization.  
55 We propose that SD is triggered by events at the perineurial sheath and then propagates laterally  
56 and more deeply into the neuropil. We conclude that the fundamental nature of SD is not  
57 dependent on the method of anoxia however the timing of onset and recovery are influenced;  
58 water immersion is complicated by the tracheal system and CO<sub>2</sub> delivery has more rapid and  
59 longer lasting effects, associated with severe interstitial acidosis.

60

61 **Key Words**

62 insect, locust, motor patterning, hypoxia, anoxic coma, pH, extracellular [K<sup>+</sup>], ganglion sheath,

63 intracellular recording, Na<sup>+</sup>/K<sup>+</sup>-ATPase, V-ATPase, ouabain, bafilomycin

## 64 **Introduction**

65 Hypoxia-tolerant animals achieve their remarkable success by virtue of mechanisms of  
66 metabolic arrest that conserve energy (Hochachka, 1986a; Hochachka, 1986b). Given the high  
67 energetic cost of information processing in the CNS (Attwell and Laughlin, 2001) a primary  
68 target for conservation is CNS ion homeostasis, the costs of which can be greatly reduced by  
69 channel arrest and spike arrest (Jonz et al., 2016; Robertson, 2017). Insects can be exposed to  
70 severe hypoxia or anoxia in a wide range of habitats (Hoback, 2012; Hoback and Stanley, 2001)  
71 and they employ a CNS arrest strategy of metabolic depression via complete neuromuscular  
72 shutdown associated with a stress-induced coma, which allows them to delay cellular energy  
73 depletion (Campbell et al., 2018; Campbell et al., 2019; Robertson et al., 2017). Although  
74 genetic approaches have identified potential molecular mechanisms underlying anoxic coma (Ma  
75 et al., 2001; Xiao and Robertson, 2016; Xiao and Robertson, 2017) and shown them to be under  
76 selection pressure (Xiao et al., 2019), we do not completely understand what processes determine  
77 the resistance to hypoxia or the speed of recovery from the coma. In addition, to expedite future  
78 research, it is important to determine the most biologically relevant methodology for inducing  
79 experimental anoxia.

80 Coma in insects and mammals are similar behaviourally (immobility and loss of  
81 responsiveness) but the neural mechanisms are different. Coma induction in insects follows a  
82 loss of membrane ion homeostasis within the nervous system, leading to a silencing of neural  
83 and muscular activity. This results in a large redistribution of ions across neuronal and glial  
84 membranes generating a wave of cellular depolarization: a phenomenon known as spreading  
85 depolarization (SD) (Dreier and Reiffurth, 2015; Pietrobon and Moskowitz, 2014; Rodgers et al.,  
86 2010), which exhibits several characteristics that are similar in both insects and mammals  
87 (Robertson et al., 2020; Spong et al., 2016a; Spong et al., 2017). There is considerable clinical  
88 interest in SD due to its involvement in several human pathologies including migraine, stroke,  
89 and traumatic brain injury (Shuttleworth et al., 2019) and the suggestion that SD may have  
90 beneficial effects to terminate and prevent seizure activity (Tamim et al., 2021). In spite of many  
91 years of research, there is limited consensus on the mechanisms of SD (Andrew et al., 2021) and  
92 insect model systems afford an opportunity to investigate SD without the difficulties associated  
93 with mammalian preparations (Spong et al., 2017).

94 In insects, there are different methods of creating anoxic conditions, which affect the  
95 characteristics of the ensuing coma, providing a means to experimentally probe the mechanisms  
96 of neural shutdown. Anoxic coma can be induced via asphyxiation, caused by exposure to any  
97 gas with less than 2% oxygen or by submersion in water. Carbon dioxide (CO<sub>2</sub>) and nitrogen gas  
98 (N<sub>2</sub>) are commonly used to immobilize insects during experimental work, however these gases,  
99 particularly CO<sub>2</sub>, can affect subsequent animal behaviour and physiology (Colinet and Renault,  
100 2012; MacMillan et al., 2017; Milton and Partridge, 2008; Perron et al., 1972; Woodring et al.,  
101 1978). Water immersion is a common, ecologically relevant cause of anoxia for many insects  
102 (Brust et al., 2005; Brust et al., 2007; Plum, 2005; Woodman, 2013; Woodman, 2015) and it has  
103 been used to investigate physiological mechanisms of anoxic coma (Benasayag-Meszaros et al.,  
104 2015; Hou et al., 2014; Robertson et al., 2019). However, whether water immersion, N<sub>2</sub> or CO<sub>2</sub>  
105 exposure have different physiological consequences in the CNS is unknown.

106 We were interested in the mechanisms of CNS shutdown that enhance metabolic  
107 depression for short durations ( $\leq 30$  mins) rather than the tissue injury that occurs after long  
108 durations of anoxia ( $> 4$  hours) (Ravn et al., 2019). We investigated the behavioural,  
109 neuromuscular and CNS consequences of water immersion or exposure to N<sub>2</sub> or CO<sub>2</sub> gas in  
110 *Locusta migratoria* to induce anoxic coma. Previous research suggests that the gas composition  
111 in the tracheae resulting from these treatments will be markedly different. Accepting that during  
112 normal ventilation air pressures in thorax and abdomen can be locally controlled (Harrison et al.,  
113 2013), it is reasonable to assume that using N<sub>2</sub> the vigorous abdominal and head pumping under  
114 respiratory distress will flush air from the tracheae inducing rapid anoxia. The action of CO<sub>2</sub> to  
115 depress sensitivity to glutamate and inhibit neuromuscular transmission, e.g. in *Drosophila*  
116 *melanogaster* larvae (Badre et al., 2005), will rapidly immobilize the locust, stopping ventilation  
117 and delaying anoxia (measured by lactate accumulation in the hemolymph), as shown in crickets,  
118 *Acheta domesticus* (Woodring et al., 1978). Water immersion will trap air in the tracheae  
119 allowing O<sub>2</sub> to be consumed until it drops below  $\sim 2\%$  ( $\sim 2$  kPa) (Wegener and Moratzky, 1995),  
120 triggering SD and hypometabolic paralysis. In *Schistocerca americana* under progressive  
121 hypoxia, the abdominal pumping rate of ventilation increases when the partial pressure of O<sub>2</sub>  
122 ( $P_{O_2}$ ) in the metathoracic ganglion drops to 5 kPa; metabolic rate decreases abruptly, indicating  
123 anoxic coma, with metathoracic  $P_{O_2}$  below 2.5 kPa (Harrison et al., 2020). Hence, we expected  
124 that water immersion would be the most benign treatment, due to a mix of CO<sub>2</sub>, N<sub>2</sub> and residual

125 O<sub>2</sub> in the tracheae during the anoxic coma. In addition, we expected that CO<sub>2</sub> would be the most  
126 physiologically disruptive treatment, combining delayed anoxia with hypercapnia and acidosis.  
127 Given the differences in speed of coma onset and recovery with different gases (Xiao et al.,  
128 2019) and the recognition that coma is triggered by SD, an important question is whether N<sub>2</sub> and  
129 CO<sub>2</sub> have different effects on SD.

130

## 131 **Methods**

### 132 *Animals*

133 Gregarious migratory locusts, *Locusta migratoria*, were reared in a crowded colony in the  
134 animal care facility in the Biosciences Complex at Queen's University. The colony was  
135 maintained on a 12:12 hr light-dark photoperiod with temperatures of 30 ± 1°C during light and  
136 26 ± 1°C during dark. Locusts were fed daily with wheat grass and a dry mixture of skim milk  
137 powder, torula yeast, and bran (1:1:13 by volume). Adult locusts 3 to 6 weeks past the final  
138 moult were used for all experiments. Mass was recorded prior to any manipulation.

139

### 140 *Whole animal anoxia*

141 Each anoxia treatment was performed on 10 males and 10 females. Locusts were tested in  
142 pairs, one male and one female, both taken from the same cage in the colony. For water  
143 immersion the locusts were placed in a perforated plastic container that was then submerged in a  
144 glass aquarium tank filled with de-chlorinated tap water at room temperature (~21 °C). To  
145 monitor recovery, locusts were removed from the water and dried by removing surface water  
146 with paper towel. For gas treatment the locusts were placed in a 1 L glass filtering flask fitted  
147 with a stopper and tubing connected to a tank of either 100 % N<sub>2</sub> or 100 % CO<sub>2</sub>. Gas was  
148 released into the flask for 1-2 minutes to replace the air before sealing the hose barb with  
149 parafilm. Locusts were removed from the flask for recovery.

150 Before entering a coma, locusts struggled to escape the anoxic environment by seeking an  
151 exit and attempting to jump and fly. After a variable period, activity ceased briefly before the  
152 appearance of convulsions and hindleg kicking and twitching that we took as the time of entry to  
153 coma. Locusts remained in the coma for 30 minutes before removal from the anoxic  
154 environment. We monitored recovery by noting the time it took for ventilatory movements of the

155 abdomen to start and then for the locust to right itself, usually abruptly, and support its weight  
156 off the substrate.

157

### 158 *Electromyographic preparation*

159 The hind legs and wings were removed to prevent accidental removal of the EMG  
160 electrode. The animal was restrained with plasticine and an EMG electrode (50  $\mu$ m copper wire,  
161 insulated except at the tip) was placed through a pinhole in the cuticle above the spiracle on the  
162 3<sup>rd</sup> abdominal segment. The electrode was inserted ~2 mm deep to reach an abdominal  
163 ventilatory muscle and was held in place with wax. A chlorided silver ground wire was inserted  
164 posteriorly into the thorax and was secured with a drop of wax.

165 Following preparation, locusts were placed into a 50 mL syringe, with one end fitted with  
166 a gas exchange and the other end open. A flow of room air was pumped through the syringe to  
167 record baseline activity for 15 minutes prior to anoxia. Then the flow was switched to either 100  
168 % CO<sub>2</sub> or 100 % N<sub>2</sub> gas to induce anoxia. For EMG recording with water immersion, following  
169 preparation the locust was confined in an open ventilated container to record 15 minutes of  
170 baseline activity. The locust was then placed in a 250 mL beaker half-filled with room  
171 temperature de-chlorinated water. A 200 mL beaker was placed inside the water-filled beaker to  
172 keep the animal submerged. For recovery, locusts were removed from the beaker and dried.

173 After the cessation of all electrical activity in the EMG trace, locusts remained in anoxia  
174 for an additional 30 minutes of coma before being returned to normoxia. Recovery was recorded  
175 for 30 minutes. We measured the time to motor pattern failure and the time to SD, indicated by  
176 the final burst of electrical activity. Recovery measures were taken as the time to excitability  
177 return and the time to motor pattern return.

178

### 179 *Semi-intact preparation*

180 We used a standard preparation for investigating neural function in the thoracic ganglia  
181 (Robertson and Pearson, 1982). Locusts were pinned to a cork substrate after removing the  
182 wings, legs and pronotum. The thorax and anterior abdomen were opened with a dorsal incision  
183 and the ventral nerve cord was exposed by removing air sacs, gut, fat body, and salivary gland.  
184 The ventral diaphragm was cut away to reveal the metathoracic ganglion. This preparation was  
185 sufficient to enable recording after minimally invasive preparation for which no nerve roots were



186 cut and the tracheal supply to the ganglia was intact. For intracellular recording, it was necessary  
187 to remove the muscles attached to the second spina between the connectives and stabilize the  
188 nervous system by supporting the meso- and metathoracic ganglia on a stainless-steel plate after  
189 cutting nerves 3, 4 and 5 on both sides of the ganglia. This minimized movement by de-  
190 efferenting the thoracic musculature. The preparation was bathed in standard locust saline (in  
191 mM: 147 NaCl, 10 KCl, 4 CaCl<sub>2</sub>, 3 NaOH and 10 HEPES buffer; pH = 7.2; chemicals from  
192 Sigma-Aldrich).

193

#### 194 *Ion-sensitive electrodes*

195 Ion-sensitive electrodes were made using silanized glass capillaries, pulled to 5-7 MΩ.  
196 For measuring [K<sup>+</sup>] they were filled at the tips with Potassium Ionophore I-Cocktail B (5%  
197 valinomycin; Sigma-Aldrich) and back-filled with 500 mM KCl (Rodgers et al., 2007). For [H<sup>+</sup>]  
198 measurement they were filled at the tips with Hydrogen ionophore I – cocktail B (10%  
199 tridodecylamine; Sigma-Aldrich) and back-filled with a solution (pH 6) of 100 mM sodium  
200 citrate and 100 mM sodium chloride (Pacey and O'Donnell, 2014). Voltage from the ion-  
201 sensitive electrode was referenced against voltage recorded with an extracellular glass  
202 microelectrode (5-7 MΩ; back-filled with 3 M KCl) positioned just adjacent. To ensure that the  
203 electrode sensitivity fell between a range of 54 to 58 mV for a 10-fold change in concentration,  
204 at room temperature, [K<sup>+</sup>] electrodes were calibrated using 15 mM and 150 mM KCl solutions  
205 and [H<sup>+</sup>] electrodes were calibrated using buffered saline at pH 6 and pH 7.

206

#### 207 *Electrophysiology*

208 Signals from extracellular electrodes (EMG wires or glass suction electrodes) were  
209 amplified using an AM Systems model 1700 differential AC amplifier with frequency cut-offs at  
210 1 Hz (low) and 10 kHz (high). Signals from ion-sensitive electrodes were amplified with a  
211 Duo773 amplifier (WPI Inc., Sarasota) using a high resistance headstage for the ion-specific  
212 electrode. Intracellular recordings were made with glass microelectrodes (20-50 MΩ, back-filled  
213 with 500 mM KCl and with 3 M KCl in the electrode holder) and amplified using a model 1600  
214 Neuroprobe amplifier (A-M Systems). All electrophysiological signals were digitized (1440A  
215 digitizer; Molecular Devices) with a sampling rate of 100 kHz and recorded using Axoscope  
216 10.7 for later analysis using Clampfit 10.7.

217

218 *Anoxia of semi-intact preparations*

219           Locusts were dissected inside a Plexiglas chamber (5 x 2.5 x 2 cm) that had a cork floor.  
220 For H<sub>2</sub>O anoxia, we completely immersed the preparation using standard locust saline, which  
221 was removed at the end of the coma with a 50 mL syringe and extension tube. For gas anoxia,  
222 the gas was supplied using a modified Pasteur pipette hooked over the end of the chamber, which  
223 could be partially sealed with electrical tape or cellophane tape (the latter enables illumination of  
224 the preparation). Positioning the tape left an aperture of approximately 1 x 1.5 cm for the  
225 electrodes to access the preparation and for the gas flow to exit. Before anoxia, an aquarium  
226 pump pumped room air through the chamber at ~100 mL/min. To induce anoxia, flow was  
227 switched to either 100 % N<sub>2</sub> or 100 % CO<sub>2</sub> from pressurized tanks at ~500 mL/min. At the end of  
228 the coma, flow was switched back to room air to flush the chamber. The duration of the coma  
229 was variable, depending on the experiment, and is noted in the Results section.

230

231 *Pharmacology*

232           Chemicals were purchased from Sigma-Aldrich, prepared in stock solutions and frozen as  
233 aliquots for later use. Bafilomycin was purchased as 0.1 mL of a ready-made solution of 160 μM  
234 in DMSO made up to 1.6 mL of 10 μM in standard locust saline. The final concentration of  
235 DMSO has no noticeable effect in the locust nervous system (Armstrong et al., 2006). Dosage  
236 was determined from prior reports of what is effective and taking into consideration the difficulty  
237 for drugs to penetrate the blood-brain barrier and permeate the ganglion. Moreover, solutions  
238 delivered by bath application will have been diluted to approximately half the original  
239 concentration by the residual saline in the thoracic cavity. We used 10 mM ouabain to inhibit the  
240 Na<sup>+</sup>-K<sup>+</sup>-ATPase (NKA) (Van Dusen et al., 2020b) and 10 μM bafilomycin A<sub>1</sub> to inhibit the V-  
241 type H<sup>+</sup>-ATPase (VA) (Kocmarek and O'Donnell, 2011).

242

243 *Statistical analysis*

244           We used SigmaPlot 13 or 14 (Systat Software Inc.) to analyze the results and generate  
245 graphs. Outliers were removed prior to analysis. Depending on the experiment, sample sizes can  
246 be different because of difficulty in taking measurements from some recordings. Data were  
247 tested for normality (Shapiro-Wilk test) and equal variance (Browne-Forsythe test). Student's t-

248 test, ANOVA (One-Way, Two-Way and Repeated Measures as appropriate) or Kruskal-Wallis  
249 One-way ANOVA on ranks for non-parametric data were used to determine statistical  
250 significance ( $P < 0.05$ ) within each measure. All-pairwise post-hoc analysis was used to  
251 determine significance between treatments within each measure: Holm-Sidak method or  
252 Bonferroni for parametric data, which are reported as mean  $\pm$  standard deviation, and Tukey test  
253 or Dunn's method for non-parametric data, which are reported as median and interquartile range  
254 (IQR). For consistency, all graphical displays of the data, whether parametric or not, are box  
255 plots showing the median and 25<sup>th</sup> and 75<sup>th</sup> percentiles with whiskers to the 10<sup>th</sup> and 90<sup>th</sup>  
256 percentiles. These are overlaid with individual data points plotted as open symbols.

257

## 258 **Results**

259

### 260 *Unrestrained whole animals*

261 Similar to crickets (Woodring et al., 1978), locusts exposed to N<sub>2</sub> struggled more  
262 vigorously (i.e. more climbing, jumping and walking) than locusts exposed to CO<sub>2</sub> gas  
263 (characterized by slower movements, in some instances no movement at all). Immersed locusts  
264 struggled the most intensely and for a longer period. Considering the full dataset of 60 locusts,  
265 none of the measures was affected by sex (Kruskal-Wallis ANOVA: time to succumb  $P = 0.89$ ;  
266 time to ventilate  $P = 0.51$ ; time to stand  $P = 0.77$ ). Hence, except as noted below, we combined  
267 the male and female data in the following analyses.

268 The time to enter a coma (**Fig. 1A**) depended on the method of anoxia (Kruskal-Wallis  
269 ANOVA:  $P < 0.001$ ;  $n = 19$  H<sub>2</sub>O, 20 N<sub>2</sub>, 20 CO<sub>2</sub>). Immersion in water took the longest time at  
270 2.1 (1.9-2.5) mins, followed by nitrogen at 0.9 (0.6-1.0) mins and then carbon dioxide at 0.3  
271 (0.3-0.4) mins (Dunn's: H<sub>2</sub>O vs CO<sub>2</sub> –  $P < 0.001$ ; H<sub>2</sub>O vs N<sub>2</sub> –  $P < 0.001$ ; N<sub>2</sub> vs CO<sub>2</sub> –  $P =$   
272 0.007).

273 The time to recover ventilation (**Fig. 1B**) depended on the method of anoxia (Kruskal-  
274 Wallis ANOVA:  $P < 0.001$ ;  $n = 20, 20, 20$ ). Immersion in water took the longest time at 24.5  
275 (18.4-30.3) mins, but there was no statistical difference between nitrogen at 9.2 (8.0-10.1) mins  
276 and carbon dioxide at 10.5 (8.4-11.3) mins (Dunn's: H<sub>2</sub>O vs CO<sub>2</sub> –  $P < 0.001$ ; H<sub>2</sub>O vs N<sub>2</sub> –  $P <$   
277 0.001; N<sub>2</sub> vs CO<sub>2</sub> –  $P = 0.61$ ).

278 The time to stand (**Fig. 1C**) depended on the method of anoxia (Kruskal-Wallis ANOVA:  
279  $P < 0.001$ ;  $n = 20, 20, 20$ ). Immersion in water took the longest time at 36.5 (32.2-43.6) mins,  
280 followed by nitrogen at 22.0 (17.1-25.7) mins and carbon dioxide at 14.0 (8.4-11.3) mins  
281 (Dunn's:  $H_2O$  vs  $CO_2 - P < 0.001$ ;  $H_2O$  vs  $N_2 - P < 0.001$ ;  $N_2$  vs  $CO_2 - P = 0.004$ ).

282 The above statistical treatment of the data was hampered by the lack of normality and/or  
283 equal variance in the full dataset. Given that sex differences in recovery from anoxia have been  
284 reported (e.g., for *Chortoicetes terminifera*, Robertson et al. 2019) we looked for any effects of  
285 sex within measures separately. We found that males took longer to recover ventilation after  
286 nitrogen anoxia (male  $10.4 \pm 1.6$  mins; female  $8.3 \pm 0.8$  mins; Student's t-test  $P = 0.001$ ;  $n = 10,$   
287 10) and females took longer to stand after carbon dioxide anoxia (male  $13.2 \pm 1.5$  mins; female  
288  $15.7 \pm 2.3$  mins; Student's t-test  $P = 0.009$ ;  $n = 10, 10$ ). There were no other differences.

289 Summary: Intact, unrestrained locusts entered a coma and recovered the ability to stand  
290 most rapidly under  $CO_2$  anoxia. To obtain more objective measures of the neuromuscular basis  
291 for this difference we recorded ventilatory muscle activity with anoxia in intact, restrained  
292 locusts.

293

#### 294 *Electromyographic recording*

295 To characterize neuromuscular failure and recovery due to anoxia, we collected a dataset  
296 from 30 locusts, using males only to reduce variability. We monitored coma induction at two  
297 well-defined time points: the cessation of ventilatory muscle motor patterning and the end of the  
298 final burst of unpatterned activity before neuromuscular silence indicating entry to coma (**Fig.**  
299 **2A**). The method of anoxia influenced the time to both measures: time to motor pattern failure  
300 (Kruskal-Wallis ANOVA:  $P < 0.001$ ,  $n = 10, 10, 10$ ) and time to coma (Kruskal-Wallis  
301 ANOVA:  $P < 0.001$ ,  $n = 10$  per treatment). Both measures show that the  $CO_2$  treatment  
302 significantly decreased induction times. The time to motor pattern failure was shorter with  $CO_2$   
303 treatments compared to  $N_2$  (Tukey:  $P = 0.003$ ), and compared to  $H_2O$  treatments (Tukey Test,  $P$   
304  $< 0.001$ ) (**Fig. 2B**) ( $H_2O$  2.7 (1.5-8.5) mins;  $N_2$  1.7 (1.5-2.2) mins;  $CO_2$  0.3 (0.2-0.3) mins).  
305 Similarly, coma occurred sooner with  $CO_2$  treatments compared to  $N_2$  treatments (Tukey:  $P =$   
306 0.002), and  $H_2O$  treatments (Tukey:  $P < 0.001$ ) (**Fig. 2C**) ( $H_2O$  4.9 (2.6-10.0) mins;  $N_2$  3.6 (3.0-  
307 4.4);  $CO_2$  0.7 (0.6-1.0) mins).

308 Neuromuscular recovery was characterized by measuring the time to the return of  
309 electrical excitability and the time to return of motor patterning (**Fig. 3A**). In a few preparations,  
310 there was some difficulty, and thus a subjective element, in determining precisely when tonic  
311 activity changed to consistent patterned activity because this was not a clear-cut transition.  
312 However, this inaccuracy is contained within the large variances due simply to individual  
313 variation. Recovery of excitability depended on the method of anoxia (One-Way ANOVA:  $P <$   
314  $0.001$ ;  $n = 10, 10, 10$ ). H<sub>2</sub>O delayed recovery compared to N<sub>2</sub> (Holm-Sidak:  $P < 0.001$ ) and  
315 compared to CO<sub>2</sub> treatments (Holm-Sidak:  $P < 0.001$ ). CO<sub>2</sub> delayed recovery compared to N<sub>2</sub>  
316 (Holm-Sidak:  $P = 0.037$ ) (**Fig. 3B**) (H<sub>2</sub>O  $12.8 \pm 3.5$  mins; N<sub>2</sub>  $4.7 \pm 1.9$  mins; CO<sub>2</sub>  $7.3 \pm 2.5$   
317 mins). Recovery of motor patterning also depended on the method of anoxia (One-Way  
318 ANOVA:  $P < 0.001$ ;  $n = 10, 10, 10$ ) and was delayed with H<sub>2</sub>O compared to N<sub>2</sub> (Holm-Sidak:  
319  $P < 0.001$ ) and CO<sub>2</sub> (Holm-Sidak:  $P < 0.001$ ) (**Fig. 3C**) (H<sub>2</sub>O  $16.8 \pm 3.6$  mins; N<sub>2</sub>  $7.6 \pm 3.1$  mins;  
320 CO<sub>2</sub>  $10.3 \pm 3.5$  mins). The motor pattern changed after recovery. Prior to anoxia the duration of  
321 motor bursts was  $0.44 \pm 0.24$  s with a frequency of  $1.03 \pm 0.29$  Hz. After recovery the burst  
322 duration increased though the difference in fold-increase due to the method of anoxia was only  
323 marginally significant (One-Way ANOVA:  $P = 0.05$ ; H<sub>2</sub>O  $1.4 \pm 0.8$ -fold; N<sub>2</sub>  $2.2 \pm 1.0$ -fold; CO<sub>2</sub>  
324  $1.2 \pm 0.7$ -fold) (**Fig. 3E**). The method of anoxia did influence the fold-change of the pattern  
325 frequency, which was reduced by gas anoxia compared to water immersion (One-Way ANOVA  
326 on transformed data (log<sub>x</sub>):  $P < 0.001$ ; H<sub>2</sub>O  $1.03 \pm 0.35$ -fold; N<sub>2</sub>  $0.34 \pm 0.15$  fold; CO<sub>2</sub>  $0.30 \pm$   
327  $0.11$ -fold) (**Fig. 3F**).

328 Summary: Neuromuscular measures of entry to coma were qualitatively like the  
329 behavioural measures. However, in contrast with the behavioural measures, we found that  
330 recovery of neural function measured electromyographically, which neglects any contribution of  
331 muscle contractility and strength, was most rapid under N<sub>2</sub> anoxia. To investigate the  
332 characteristics of SD, we recorded the transperineurial potential of the metathoracic ganglion  
333 during anoxia of semi-intact preparations.

334

### 335 *Transperineurial potential recording*

336 SD is characterized by an abrupt negative shift in the extracellular DC potential. In  
337 locusts this is recorded from the interstitial space of the ganglion relative to the bathing saline  
338 and is equivalent to the transperineurial potential (TPP) across the blood brain barrier (BBB)

339 (Robertson et al., 2020; Schofield and Treherne, 1984). To characterize the dynamics of SD we  
340 recorded the TPP simultaneously with a nerve recording of ventilatory activity and an EMG  
341 recording from muscles controlling the hindwing (**Fig. 4**). In 10 locusts for each method of  
342 anoxia we measured the time for the ventilatory rhythm to fail (**Fig. 5A**) and the time to the onset  
343 of SD taken at the half-amplitude of the negative DC shift (**Fig. 5B**). After ~1 min in the coma  
344 (timed from SD onset) the preparation was returned to normoxia and we measured the time for  
345 the return of ventilatory motor patterning (**Fig. 5C**) and the time for the TPP to return to normal  
346 taken at the half-amplitude of the TPP recovery (**Fig. 5D**). To characterize the negative DC shift  
347 we measured its amplitude (**Fig. 5E**) and the slope of the TPP recovery (**Fig. 5F**).

348 The method of anoxia affected the time for motor patterning to fail (Kruskal-Wallis  
349 ANOVA:  $P < 0.001$ ;  $n = 10$  H<sub>2</sub>O, 9 N<sub>2</sub>, 10 CO<sub>2</sub>). Time to rhythm failure was shorter with CO<sub>2</sub>  
350 than with either H<sub>2</sub>O (Dunn's:  $P = 0.005$ ) or N<sub>2</sub> (Dunn's:  $P < 0.001$ ) but there was no difference  
351 between H<sub>2</sub>O and N<sub>2</sub> (Dunn's:  $P = 0.48$ ). (H<sub>2</sub>O 2.7 (2.0-2.9) mins; N<sub>2</sub> 3.6 (2.7-4.3) mins; CO<sub>2</sub> 0.3  
352 (0.2-0.5) mins). Similarly, the method of anoxia affected the time to enter a coma (Kruskal-  
353 Wallis ANOVA:  $P < 0.001$ ;  $n = 10$  H<sub>2</sub>O, 10 N<sub>2</sub>, 9 CO<sub>2</sub>). Time to SD was shorter with CO<sub>2</sub> than  
354 with either H<sub>2</sub>O (Dunn's:  $P = 0.01$ ) or N<sub>2</sub> (Dunn's:  $P < 0.001$ ) but there was no difference  
355 between H<sub>2</sub>O and N<sub>2</sub> (Dunn's:  $P = 0.25$ ). (H<sub>2</sub>O 5.2 (4.4-5.7) mins; N<sub>2</sub> 7.3 (5.6-8.9) mins; CO<sub>2</sub> 2.1  
356 (1.9-2.9) mins).

357 The method of anoxia affected the time for motor patterning to recover (Kruskal-Wallis  
358 ANOVA:  $P < 0.001$ ;  $n = 8$  H<sub>2</sub>O, 8 N<sub>2</sub>, 10 CO<sub>2</sub>). Time to rhythm recovery was longer with CO<sub>2</sub>  
359 than with either H<sub>2</sub>O (Dunn's:  $P = 0.002$ ) or N<sub>2</sub> (Dunn's:  $P = 0.02$ ) but there was no difference  
360 between H<sub>2</sub>O and N<sub>2</sub> (Dunn's:  $P = 1.0$ ). (H<sub>2</sub>O 3.1 (2.9-3.8) mins; N<sub>2</sub> 3.2 (2.9-4.3) mins; CO<sub>2</sub> 5.7  
361 (4.2-7.7) mins). Similarly, the method of anoxia affected the time for the TPP to recover  
362 (Kruskal-Wallis ANOVA:  $P < 0.001$ ;  $n = 10, 10, 10$ ). Time to TPP recovery was longer with  
363 CO<sub>2</sub> than with either H<sub>2</sub>O (Tukey:  $P = 0.002$ ) or N<sub>2</sub> (Tukey:  $P < 0.01$ ) but there was no  
364 difference between H<sub>2</sub>O and N<sub>2</sub> (Tukey:  $P = 1.0$ ). (H<sub>2</sub>O 1.1 (1.0-1.3) mins; N<sub>2</sub> 1.0 (1.0-1.3) mins;  
365 CO<sub>2</sub> 2.6 (2.1-3.5) mins).

366 The amplitude of the negative DC shift was dependent on the method of anoxia (One  
367 Way ANOVA:  $P < 0.001$ ;  $n = 10, 10, 10$ ). TPP amplitude with H<sub>2</sub>O was larger than with N<sub>2</sub>  
368 (Holm-Sidak:  $P < 0.001$ ) or with CO<sub>2</sub> (Holm-Sidak:  $P = 0.02$ ). There was also a difference in  
369 TPP amplitude between N<sub>2</sub> and CO<sub>2</sub> (Holm-Sidak:  $P = 0.002$ ). (H<sub>2</sub>O  $58 \pm 4.2$  mV; N<sub>2</sub>  $41 \pm 6.3$

370 mV; CO<sub>2</sub> 52 ± 7.9 mV). The method of anoxia also affected the slope of the TPP recovery  
371 trajectory (One Way ANOVA: P < 0.001; n = 10, 10, 10). This slope was larger with H<sub>2</sub>O than  
372 with N<sub>2</sub> (Holm-Sidak: P = 0.03) or with CO<sub>2</sub> (Holm-Sidak: P < 0.001). There was also a  
373 difference in the TPP recovery slope between N<sub>2</sub> and CO<sub>2</sub> (Holm-Sidak: P = 0.004). (H<sub>2</sub>O 82 ±  
374 24 mV/min; N<sub>2</sub> 60 ± 24 mV/min; CO<sub>2</sub> 28 ± 12 mV/min).

375         Summary: CO<sub>2</sub> had a strong effect on the timing of neural failure and entry to anoxic  
376 coma (earlier) and recovery on return to normoxia (later) but there was no difference between  
377 H<sub>2</sub>O and N<sub>2</sub>. However, the size and shape of the negative DC shift of the TPP was different in  
378 each of the treatments. Delivery of 100 % CO<sub>2</sub> gas is expected to generate a rapid hypercapnic  
379 acidosis as the gas is delivered directly to the CNS through the tracheoles while the locust  
380 continues to ventilate. To confirm this, in the next experiments we measured ion concentrations  
381 in the interstitial space of the metathoracic ganglion.

382

### 383 *Measurement of extracellular ion concentrations*

384         Given that there was no difference between H<sub>2</sub>O and N<sub>2</sub> in the timing of SD and recovery  
385 we compared extracellular ion concentration changes only for N<sub>2</sub> and CO<sub>2</sub> anoxia. We measured  
386 interstitial pH (pH<sub>o</sub>) in 6 male locusts for each gas. The onset of N<sub>2</sub> provoked an immediate  
387 increase in the frequency of the ventilatory rhythm but had no effect on pH<sub>o</sub> (**Fig. 6A**). In  
388 contrast, the onset of CO<sub>2</sub> caused an abrupt decrease in pH<sub>o</sub> and the increase in the ventilatory  
389 rhythm frequency was transient before a large burst of unpatterned nerve activity leading to  
390 electrical silence (**Fig. 6B**). Nevertheless, pH<sub>o</sub> decreased for both gases during the coma (**Fig.**  
391 **6C,D**). After the return to normoxia, pH<sub>o</sub> recovery took longer than the recovery of the TPP. In  
392 addition, there was a transient decrease in pH<sub>o</sub> around the time that neuronal excitability  
393 recovered (**Fig. 6C,D**). At the start of recovery, pH<sub>o</sub> increased by 0.26 ± 0.14 units per minute  
394 but transiently decreased by -0.20 ± 0.18 units per minute when nerve activity resumed (**Fig.**  
395 **6E**). Both the nature of the gas and the time of measurement (before and after SD) had effects on  
396 pH<sub>o</sub> (**Fig. 6F**) and there was a significant interaction (Two-way ANOVA: P<sub>gas</sub> = 0.028; P<sub>time</sub> <  
397 0.001; P<sub>gas x time</sub> = 0.01). pH<sub>o</sub> before anoxia was 7.3 ± 0.4 (N<sub>2</sub>) and 7.4 ± 0.3 (CO<sub>2</sub>) (Holm-Sidak:  
398 P = 0.75) and reached a peak during the coma of 6.8 ± 0.4 for N<sub>2</sub>, and significantly lower 6.0 ±  
399 0.3 for CO<sub>2</sub> (Holm-Sidak: P = 0.001). The pH<sub>o</sub> reduction was significant for both gases (Holm-  
400 Sidak: P = 0.02 for N<sub>2</sub>; P < 0.001 for CO<sub>2</sub>).

401 We recorded  $[K^+]_o$  in 7 male locusts for each gas and quantified it at three time points:  
402 prior to gas onset (Initial  $[K^+]_o$ ); at the approximate start of the abrupt increase (Ignition  $[K^+]_o$ );  
403 and during the coma (Plateau  $[K^+]_o$ ). Similar to the pH experiments, the onset of  $N_2$  provoked an  
404 immediate increase in the frequency of the ventilatory rhythm but had no effect on  $[K^+]_o$  (**Fig.**  
405 **7A**). In contrast, the onset of  $CO_2$  caused an abrupt increase in  $[K^+]_o$  and the increase in the  
406 ventilatory rhythm frequency was transient before a large burst of unpatterned nerve activity  
407 leading to electrical silence (**Fig. 7B**). SD was associated with the characteristic surge of  $[K^+]_o$   
408 for both gases (**Fig. 7C,D**). The  $[K^+]_o$  values during the surge were not affected by the nature of  
409 the gas (**Fig. 7E,F,G**). Initial  $[K^+]_o$  was  $13.1 \pm 2.6$  mM for  $N_2$  and  $13.4 \pm 2.3$  mM for  $CO_2$   
410 (Student's t test:  $P = 0.77$ ); Ignition  $[K^+]_o$  was  $31.5 \pm 5.8$  mM for  $N_2$  and  $28.7 \pm 6.6$  mM for  $CO_2$   
411 (Student's t test:  $P = 0.42$ ); Plateau  $[K^+]_o$  it was  $99.0 \pm 22.0$  mM for  $N_2$  and  $97.9 \pm 11.8$  for  $CO_2$   
412 (Student's t test:  $P = 0.91$ ).

413 Summary: Delivery of  $CO_2$  had immediate effects to decrease  $pH_o$  and increase  $[K^+]_o$ ,  
414 which were not evident with  $N_2$ . The surge of  $[K^+]_o$  as a consequence of SD was not  
415 quantitatively affected by the nature of the gas, though the overall shape could vary. The  
416 negative DC shift associated with anoxia-induced SD propagates throughout the neuropil and on  
417 return to air there is a variable postanoxic negativity (PAN), which has been attributed to NKA  
418 (e.g. (Spong et al., 2016b)). To determine if the SD propagation rate and recovery was affected  
419 by the gas, we investigated these features in the next experiments.

420

#### 421 *Propagation and Postanoxic Negativity*

422 To investigate SD propagation and the PAN, we recorded TPP at two locations in 14  
423 male locusts each of which had a  $N_2$  and a  $CO_2$  coma (5 mins duration after SD onset) with  
424 presentation order alternating between animals. In addition, to determine the consequences of the  
425 more invasive preparation required for intracellular recording, 6 of the 14 were minimally  
426 dissected and 8 were prepared for intracellular recording (i.e. with nerve roots cut and the meso-  
427 and metathoracic ganglia supported on a metal plate).

428 For both  $N_2$  and  $CO_2$  it was possible to measure a latency between the negative DC shifts  
429 recorded at different locations while the immediate effects of gas onset and return of air were  
430 simultaneous (**Fig 8A,B**). This latency was highly variable because it depends on the relative  
431 positions of the electrodes and the location of SD ignition, which could not be controlled. The



432 latency was  $23.5 \pm 14.8$  s ( $n = 28$ ) with no effect of the method of anoxia or of cutting nerve  
433 roots and no interaction (Two-way ANOVA:  $P_{\text{gas}} = 0.22$ ;  $P_{\text{cut}} = 0.42$ ;  $P_{\text{gas} \times \text{cut}} = 0.22$ ). Electrode  
434 separation was  $\sim 0.75$  mm, giving a propagation speed of  $\sim 2$  mm/min. On the other hand, cutting  
435 the nerve roots and the gas did have an effect on the PAN amplitude (Two-way RM ANOVA:  
436  $P_{\text{gas}} = 0.004$ ;  $P_{\text{cut}} = 0.002$ ;  $P_{\text{gas} \times \text{cut}} = 0.03$ ). Cutting had a greater effect with  $\text{CO}_2$ , dropping PAN  
437 amplitude from  $6.2 \pm 0.74$  mV to  $1.5 \pm 0.64$  mV (Bonferroni:  $P < 0.001$ ) whereas with  $\text{N}_2$  cutting  
438 dropped PAN amplitude from  $3.8 \pm 0.74$  mV to  $1.2 \pm 0.64$  mV (Bonferroni:  $P = 0.016$ ). In  
439 minimally dissected preparations there was a significant effect of the gas (Bonferroni:  $P = 0.002$ )  
440 but not in preparations with the nerve roots cut (Bonferroni:  $P = 0.49$ ).

441 In a separate project investigating the effects of saline additives (glucose and trehalose;  
442 manuscript in preparation), we measured PAN amplitude in 36 minimally dissected locusts (18  
443 male and 18 female) after 10 mins of  $\text{N}_2$  coma. There was no effect of the saline additives but a  
444 strong effect of sex with no interaction (Two-way ANOVA:  $P_{\text{sex}} < 0.001$ ;  $P_{\text{saline}} = 0.84$ ;  $P_{\text{sex} \times \text{saline}}$   
445  $= 0.54$ ). PAN amplitude was  $7.2 \pm 0.58$  mV in males and  $3.5 \pm 0.62$  in females (Holm-Sidak:  $P <$   
446  $0.001$ ) (**Fig. 8C**).

447 The length of time in a coma is known to affect the recovery from  $\text{N}_2$ -induced SD (Van  
448 Dusen et al., 2020b). To investigate the effect of coma duration on PAN amplitude, 12 locusts  
449 were each given  $\text{N}_2$  comas with durations of 1, 5 and 10 mins from the onset of SD, with  
450 presentation order arranged so that all combinations of coma duration and presentation order  
451 were represented. There was a strong effect of coma duration on PAN amplitude but no effect of  
452 presentation order (Two-way ANOVA:  $P_{\text{duration}} < 0.001$ ;  $P_{\text{order}} = 0.31$ ;  $P_{\text{duration} \times \text{order}} = 0.49$ ). The  
453 largest PAN amplitude occurred after 10 mins of coma ( $5.4 \pm 2.3$  mV), then 5 mins ( $4.0 \pm 2.2$ )  
454 and 1 min ( $1.6 \pm 1.5$  mV) (Holm-Sidak: TEN vs. ONE  $P < 0.001$ ; FIVE vs. ONE  $P = 0.001$ ;  
455 TEN vs. FIVE  $P = 0.03$ ) (**Fig. 8D**).

456 It has been suggested that the PAN is associated with re-activation of NKA when  
457 normoxic mitochondrial operation resumes (Spong et al., 2016b). To test this, we investigated  
458 the effect of the NKA inhibitor ouabain on the PAN in 6 male locusts given repeated 5 min  $\text{N}_2$   
459 comas. Prolonged exposure to 10 mM ouabain in a minimally dissected preparation results in a  
460 gradual negative shift of the TPP from  $\sim 15$  mV to  $\sim -40$  mV, which is taken to indicate the  
461 transition from 100 % NKA function to 0 % NKA function (Van Dusen et al., 2020b). In none of  
462 the locusts was the PAN eradicated or even reduced; indeed, it increased in amplitude and

463 duration (**Fig. 8E**). To gain insight into the underlying mechanism, we re-examined the  
464 recordings made with ion-sensitive electrodes (see above) and found that in none of the  $[K^+]_o$   
465 recordings was there any indication of  $[K^+]_o$  changes coincident with the PAN. However in 8 of  
466 the 12 preparations for  $[H^+]_o$  recording we could detect an increase in  $[H^+]_o$  equivalent to a mean  
467  $pH_o$  decrease of  $0.04 \pm 0.03$  units (**Fig. 8F**).

468 Summary: The nature of the gas used for anoxia had no effect on SD propagation but in  
469 minimally dissected preparations the PAN was larger after  $CO_2$  anoxia than after  $N_2$  anoxia. The  
470 PAN was also larger in males and positively correlated with coma duration. We could not link  
471 the PAN to NKA function, but it was associated with a drop in  $pH_o$ . One possibility is that the  
472 PAN represents the electrogenic effect of a proton pump (VA). We next tested that using the VA  
473 inhibitor bafilomycin.

474

#### 475 *Bafilomycin*

476 To investigate the effect on the PAN of inhibiting VA we recorded TPP during repeated  
477 10-minute duration  $N_2$  comas. For 9 control locusts there was no intervention and for 10  
478 experimental locusts 200  $\mu L$  of 10  $\mu M$  bafilomycin was added to the bathing saline after the first  
479 coma. Bafilomycin had two striking effects. First, it generated a positive DC shift in the TPP of  
480  $8.6 \pm 2.9$  mV, which developed over  $9.3 \pm 1.4$  mins ( $n = 10$ ). Second, it eradicated the PAN at  
481 the return to normoxia (**Fig. 9A**; example from a  $CO_2$  coma). This is clear after ouabain pre-  
482 treatment, which accentuated the PAN; subsequent bafilomycin eradicated it (**Fig. 9B**; example  
483 from a  $N_2$  coma). The PAN amplitude was reduced by bafilomycin but not by repeated anoxia  
484 (Two-way RM ANOVA:  $P_{drug} < 0.001$ ;  $P_{anoxia} = 0.007$ ;  $P_{drug \times anoxia} = 0.011$ ). In control  
485 preparations the first PAN amplitude was  $4.9 \pm 1.3$  mV and the second was  $4.8 \pm 1.3$  mV  
486 (Bonferroni:  $P = 0.88$ ), whereas in experimental preparations the first PAN amplitude was  $3.9 \pm$   
487  $2.1$  mV and the second, after bafilomycin, was  $1.3 \pm 1.2$  mV (Bonferroni:  $P < 0.001$ ). There was  
488 no difference between PANs of first anoxias (Bonferroni:  $P = 0.15$ ) but there was between PANs  
489 of second anoxias (Bonferroni:  $P < 0.001$ ) (**Fig. 9C**).

490 To determine whether bafilomycin affected the response to anoxia, we compared the  
491 percentage change in the timing of failure and recovery of the second anoxia compared with the  
492 first anoxia (**Fig. 10**). In control preparations, the time to failure was generally longer for a repeat  
493 anoxia compared with the first whereas after bafilomycin the time to rhythm failure was shorter

494 and there was minimal change in the time to SD. The change in the time to rhythm failure  
495 was  $-0.6$  ( $-0.8 - 22.9$ ) % in controls and  $-8.5$  ( $-12.0 - 3.8$ ) % after bafilomycin (Kruskal-Wallis  
496 ANOVA:  $P = 0.08$ ; after transforming the data  $[\ln(x+17)]$  Student's t-test  $P = 0.03$ ) (**Fig. 10A**).  
497 The change in the time to SD was  $31.5 \pm 28.3$  % in controls and  $3.9 \pm 17.3$  % after bafilomycin  
498 (Student's t-test:  $P = 0.02$ ) (**Fig. 10B**). The change in the recovery of the TPP measured as the  
499 time from air on to the time at half-amplitude was  $-7.4 \pm 10.7$  % in controls and  $-19.4 \pm 2.9$  %  
500 after bafilomycin (Student's t-test:  $P = 0.02$ ) (**Fig. 10C**). Despite an earlier recovery of the TPP  
501 after bafilomycin, it took longer for the rhythm to recover:  $-3.9 \pm 13.8$  % in controls and  $30.7 \pm$   
502  $33.6$  % after bafilomycin (Welch's t-test for unequal variances;  $P = 0.02$ ) (**Fig. 10D**).

503 Summary: Bafilomycin caused a long-term positive DC shift of TPP and eradicated the  
504 PAN, consistent with inhibition of the electrogenic VA. In addition, bafilomycin hastened the  
505 onset of rhythm failure and coma and delayed the onset of rhythm recovery. Next, we used  
506 intracellular recordings to compare the effects of  $N_2$  and  $CO_2$  on excitable cells.

507

#### 508 *Intracellular Recording*

509 Recording intracellularly from muscle fibres during the onset of anoxia is difficult  
510 because of the rapid muscle twitching and contractions prior to coma. Nevertheless, we managed  
511 to record successfully in 6 locusts (2 male and 4 female), which were given 7  $N_2$  anoxia and 6  
512  $CO_2$  anoxia treatments. Recordings were taken from the posterior rotator of the mesothoracic  
513 coxa (muscle 93 of (Snodgrass, 1929)) because of its convenient location in this preparation,  
514 originating on the second spina between the connectives and immediately anterior to the  
515 metathoracic ganglion. Resting membrane potential was  $-45.8 \pm 10.7$  mV, which generally  
516 hyperpolarized at gas onset prior to the depolarization and burst of activity associate with entry  
517 to coma (**Fig. 11**). The extent of the depolarization was not affected by the gas ( $V_m$  during coma:  
518  $N_2 = -25.8 \pm 4.5$  mV;  $CO_2 = -26.2 \pm 5.3$  mV; Student's t-test  $P = 0.9$ ). However, the latency  
519 from anoxia to the beginning of the burst was considerably shorter with  $CO_2$  anoxia ( $N_2 = 2.7$   
520 ( $2.2-3.8$ ) mins;  $CO_2 = 0.45$  ( $0.2-0.6$ ) mins; Kruskal-Wallis:  $P = 0.004$ ). Not surprisingly, there  
521 was no change in muscle  $V_m$  at the time of SD in the ganglion.

522 We recorded intracellularly from neurons in 12 locusts (10 male and 2 female), which  
523 were given 14  $N_2$  anoxias and 11  $CO_2$  anoxias. The recordings were taken from the neuropil  
524 segments of wing muscle motoneurons, which have extensive arborizations located in a dorsal

525 layer just under the ganglion sheath. These neurons receive a constant barrage of postsynaptic  
526 potentials at “rest” and have large, overshooting action potentials. Membrane potential ( $V_m$ ) was  
527 derived from the intracellular recording relative to ground ( $V_i$ ) minus the extracellular recording  
528 relative to ground ( $V_o = \text{TPP}$ ) (**Fig. 12A**). Initial membrane potential ( $V_m$ ) was  $-69.6 \pm 6.5$  mV  
529 and TPP ( $V_o$ ) was  $12.7 \pm 6.0$  mV. Gas onset caused a transient hyperpolarization followed by  
530 neuronal activation, which was initially patterned, occasionally with a flight-like rhythm, before  
531 turning tonic as the strength of synaptic interactions waned (**Fig. 12B**). During the coma (after  
532 SD onset), there was no effect of the nature of the gas on  $V_m$  ( $\text{N}_2 = -3.9 \pm 6.0$  mV;  $\text{CO}_2 = -7.2 \pm$   
533  $7.6$ ; Student’s t-test:  $P = 0.25$ ) or on TPP ( $\text{N}_2 = -35.5 \pm 9.4$  mV;  $\text{CO}_2 = -31.6 \pm 10.4$  mV;  
534 Student’s t-test:  $P = 0.35$ ). Similarly, after recovery there was no effect of the gas on  $V_m$  ( $\text{N}_2 = -$   
535  $71.6 \pm 8.6$  mV;  $\text{CO}_2 = -70.9 \pm 9.0$  mV; Student’s t-test:  $P = 0.86$ ) or on TPP ( $\text{N}_2 = 13 \pm 5.8$  mV;  
536  $\text{CO}_2 = 14.7 \pm 9.7$  mV; Student’s t-test:  $P = 0.6$ ). The primary difference associated with the  
537 nature of the gas was that with  $\text{CO}_2$  the depolarization prior to SD was faster and the  
538 repolarization on recovery was slower (**Fig. 12C**). Neurons depolarized in two stages, the second  
539 stage being simultaneous with the negative DC shift of the TPP. With  $\text{N}_2$ , the first stage was  
540 relatively gradual, with little change to TPP. Whereas, with  $\text{CO}_2$ , the first depolarization was  
541 relatively abrupt and  $V_m$  stepped to  $-46.6 \pm 6.1$  mV ( $\sim 25$  mV depolarization), while TPP stepped  
542 to  $3.9 \pm 8.6$  mV ( $\sim 10$  mV negative DC shift).

543 We wanted to confirm that SD was associated with a membrane conductance decrease of  
544 neuronal membranes by recording the voltage response to constant current pulses (1-5 nA).  
545 However, this was complicated by the fact that the input resistance across the sheath changed  
546 markedly during onset and recovery of the anoxic coma. Normally, for intracellular measurement  
547 of neuronal input resistance the effect of the  $V_m$  voltage drop across the electrode resistance  
548 (variable in different experiments) is cancelled by balancing a bridge circuit of the amplifier.  
549 This is acceptable for  $V_i$  measures relative to ground if  $V_o$  does not change. However, in these  
550 experiments,  $V_o$  and the input resistance of the sheath changed dramatically at SD onset and this  
551 contaminates the intracellular  $V_i$  recording.

552 Prior to anoxia the  $R_{in}$  of the sheath was  $0.14 \pm 0.04$  M $\Omega$  ( $n = 3$ ). In 10 male locusts, we  
553 measured the changes in input resistance of the sheath using constant current pulses (**Fig. 13A**).  
554 At about the time that patterning of activity in the nerve recording ceased, the sheath  $R_{in}$  started  
555 to gradually increase until there was a more abrupt increase at SD onset. During the coma, sheath

556  $R_{in}$  was constant and  $3.7 \pm 1.8$  times the initial value. This gradually returned to  $0.75 \pm 0.47$   
557 times the initial value after recovery. The increased  $R_{in}$  during SD was different from initial and  
558 recovered values (One-way RM ANOVA followed by Bonferroni posthoc comparisons:  $P <$   
559  $0.001$ ). There was no difference between initial and recovered values (Bonferroni:  $P = 1.0$ ).

560 In some intracellular recordings it was possible to examine the voltage response to  
561 current pulses and discount the immediate voltage shift cause by an unbalanced bridge and  
562 measure only the exponential change in voltage that would be expected of the voltage drop  
563 across a membrane capacitance. Doing this, in 7 male locusts with 8  $N_2$  anoxias and 6  $CO_2$   
564 anoxias, neuronal  $R_{in}$  was initially  $2.3 \pm 1.1 M\Omega$  and there was no significant change until SD  
565 onset. At SD onset,  $R_{in}$  decreased to  $0.3 \pm 0.5 M\Omega$ , returning to  $2.0 \pm 0.8 M\Omega$  on recovery; there  
566 was no effect of the gas (Two-way RM ANOVA:  $P_{gas} = 0.70$ ;  $P_{timing} < 0.001$ ;  $P_{gas \times timing} = 0.82$ ).  
567 In the  $V_i$  recordings of all  $CO_2$  anoxias and some  $N_2$  anoxias, there was a clear negative notch in  
568 the voltage at the onset of SD (**Fig. 13Bi,ii**). This was simultaneous with the decrease in neuronal  
569 membrane resistance and the increase in sheath input resistance (**Fig. 13Biii,iv,v**).

570 Summary: Muscle fibres depolarized during anoxia. The nature of the gas did not affect  
571 the extent of the depolarization, but  $CO_2$  had a more rapid onset and slower recovery. Neurons  
572 depolarized in two stages during anoxia.  $CO_2$  caused a relatively rapid initial depolarization prior  
573 to SD. There was an abrupt conductance increase in neurons that occurred at SD onset and was  
574 not affected by the nature of the gas. Recovery was slower with  $CO_2$  anoxia.

575

## 576 Discussion

577 Locusts recover the ability to stand after 6 hours in a  $N_2$ -induced coma (Wu et al., 2002).  
578 However, recovery is incomplete with muscle tissue damage after 4 hours of anoxia (Ravn et al.,  
579 2019) and they have been known to die without feeding 3-5 days after only 2 h of anoxia (Michel  
580 and Wegener, 1982). In adult *Drosophila*, the ability to withstand anoxia is related to the  
581 maintenance of hypometabolism and tolerance of ionic variability (Campbell et al., 2018;  
582 Campbell et al., 2019). We were interested in the contribution of the CNS to hypometabolism  
583 and in the effects of different methods of inducing anoxia prior to any permanent injury. Thus,  
584 we used anoxia durations that result in apparently complete recovery ( $\leq 30$  mins). We found that  
585 at the level of the CNS there was little difference between the effects of water immersion and  
586 those of 100%  $N_2$  treatment. However, although intact locusts recovered faster from a  $CO_2$

587 anoxia than from N<sub>2</sub> or H<sub>2</sub>O, the effects of CO<sub>2</sub> in the CNS, which were more rapid and intense  
588 at onset, took longer to dissipate. The slower recovery of CNS operation with CO<sub>2</sub> was  
589 associated with a slow recovery from a much more pronounced interstitial acidosis and a greater  
590 activation of a V-ATPase. SD, when it occurred, was not obviously affected by the nature of the  
591 gas, suggesting that its mechanisms were unchanged. At SD onset, the adglial membrane of  
592 perineurial glial cells depolarized before deeper neuronal membranes, indicating that anoxic SD  
593 propagates from an event initiated at the perineurial layer of the BBB. This intriguing result  
594 provides a novel perspective on SD mechanisms considering the density of mitochondria packed  
595 into perineurial glial cells surrounding the ganglia (Smith and Shipley, 1990).

596

### 597 *Motor patterning*

598         The first sign of hypoxia was an increase in the frequency of abdominal pumping  
599 movements. Nerve recording of the underlying motor pattern showed that this occurred  
600 immediately, before any change in pH<sub>o</sub> or [K<sup>+</sup>]<sub>o</sub> was recorded. The central pattern generator for  
601 ventilation is located in the metathoracic ganglion (Bustami and Hustert, 2000) where detection  
602 of O<sub>2</sub> and CO<sub>2</sub> levels is likely a widespread property of neural tissue rather than being located in  
603 specific regions (Bustami et al., 2002; Talal et al., 2019). A recent model of O<sub>2</sub> chemoreception  
604 in glomus cells of the mammalian carotid body proposes that acute detection of reduced O<sub>2</sub> is a  
605 function of mitochondrial complex IV with subsequent mitochondrial signalling via NADH and  
606 reactive oxygen species to membrane ion channels (Ortega-Saenz and Lopez-Barneo, 2020;  
607 Ortega-Saenz et al., 2020). Hence, to a greater or lesser extent, neurons will respond to metabolic  
608 perturbation of mitochondria; indeed this is recognized as a mechanism for the homeostatic  
609 regulation of neuron excitability (Ruggiero et al., 2021). After recovery, the frequency of the  
610 ventilatory motor pattern was greatly reduced by N<sub>2</sub> and CO<sub>2</sub> anoxia but not by water immersion.  
611 Mammalian ventilatory reflexes can be facilitated by the energy sensor, AMPK, which is  
612 activated by an increasing AMP:ATP ratio (Evans, 2019; Evans and Hardie, 2020), also  
613 implicating the involvement of mitochondrial operation. In locusts, the ventilatory motor pattern  
614 changes induced by mitochondrial inhibition using sodium azide (chemical “anoxia”) are  
615 mimicked by AMPK activation using AICAR, although in the latter case there is no SD  
616 (Rodgers-Garlick et al., 2011). Given the difference in the motor pattern changes after recovery,

617 our current results suggest that water immersion was less metabolically stressful than N<sub>2</sub> or CO<sub>2</sub>  
618 exposure. This may have been a consequence of residual O<sub>2</sub> in the tracheae at coma onset.

619 The second stage in the behavioural response to increasing hypoxia was a transition from  
620 vigorous ventilation to immobility. In nerve and neuron recordings, this was associated with an  
621 abrupt transition from patterned neural activity to tonic firing. Initially we ascribed this to a  
622 failure of synaptic transmission, however synaptic potentials were recorded in neurons up to the  
623 point when excitability failed. Moderate excitation increased ventilatory activity and could  
624 activate latent circuitry (e.g., to release flight-like motor patterns). The failure of motor  
625 patterning may have been due to a reduction of synaptic potential amplitude below a threshold  
626 required for circuit operation. Alternatively, the excitatory effects of extreme hypoxia may have  
627 generated spike frequencies that preclude patterning i.e., by rendering firing neurons  
628 unresponsive to inhibitory inputs. This could be resolved by monitoring identified synapses (e.g.  
629 from the wing hinge stretch receptor to flight interneurons (Gee and Robertson, 1994)) before,  
630 during and after anoxia. The recovery of motor patterning is clearly dependent on the recovery of  
631 synaptic transmission in neuronal circuits. In mammalian preparations, the recovery of synaptic  
632 transmission after SD is delayed by an accumulation of adenosine, which presynaptically inhibits  
633 transmitter release (Lindquist and Shuttleworth, 2012; Lindquist and Shuttleworth, 2017).  
634 Adenosine also delays functional recovery after anoxic comas in locusts but does not affect the  
635 timing of SD (Van Dusen et al., 2020a).

636 The effects of anoxia on circuit function are distinct from anoxic SD. Whereas SD arrests  
637 all neural function, metabolic stress can affect motor patterning in the absence of SD. Moreover,  
638 the timing of motor pattern failure and recovery can be modified independently from the  
639 temporal characteristics of SD. This suggests that the mechanisms of SD are independent from  
640 the specific mechanisms underlying action potential generation and synaptic transmission.

641

642 *Sex*

643 After anoxia, male locusts recover CNS operation more slowly than females (Hou et al.,  
644 2014; Robertson et al., 2019; Van Dusen et al., 2020a). Our results confirm that males recover  
645 ventilation more slowly than females after N<sub>2</sub> anoxia. In the Australian Plague Locust, this sex  
646 difference develops during maturation of adults in the gregarious phase, at the time when adults  
647 start mating, suggesting that it is associated with increased CNS metabolic rate of males

648 competing for mates in a crowded environment (Robertson et al., 2019). The fact that females  
649 recovered the ability to stand after CO<sub>2</sub> anoxia more slowly than males may reflect prolonged  
650 effects of CO<sub>2</sub> anesthesia on a larger muscle mass in females. The timing of behavioural  
651 recovery after anoxia is positively correlated with the duration of the coma due to the build-up of  
652 metabolites (e.g., adenosine; see above) that take time to clear (Lighton and Schilman, 2007;  
653 Weyel and Wegener, 1996). Moreover, recovery from a prior anoxia, a treatment known to  
654 reduce neural performance and whole animal metabolic rate via activation of AMPK (Money et  
655 al., 2014), reduces the time to recovery from a subsequent anoxia (Robertson et al., 2019). Thus,  
656 energy metabolism during the coma will have an impact on the timing of recovery. It is  
657 important to note that recovery of the CNS, while obviously permissive for recovery of the  
658 whole animal, may be differentially modulated by neural conditions and/or neuromodulators that  
659 could have a minimal or different impact on the intact locust. Neural energetics in insects are  
660 under tissue-specific neuromodulatory control in ways that support age-dependent or phase-  
661 dependent behaviours (Rittschof and Schirmeier, 2018; Rittschof et al., 2019).

662 An additional sex-difference was that, after 10 mins of N<sub>2</sub> coma, the amplitude of the  
663 PAN of males was twice that of females. We found that the PAN was associated with a transient  
664 decrease in pH<sub>o</sub> and could be eradicated by pretreatment with bafilomycin, an inhibitor of VA, a  
665 proton pump. We attribute the PAN to the electrogenic effect of VA and its negative quality  
666 indicates that protons were being cleared from the interstitium into the hemolymph (bathing  
667 saline). The fact that the amplitude of the PAN was strongly and positively correlated with the  
668 duration of the coma suggests that it reflects the build-up of protons derived from anaerobic  
669 metabolic activity. This would parallel the build-up of the anaerobic end product, lactate, which  
670 has been described for hemolymph of *Acheta domesticus* (Woodring et al., 1978), whole animals  
671 and flight muscle of *Schistocerca gregaria* (Hochachka et al., 1993), pupae of *Manduca sexta*  
672 (Woods and Lane, 2016) and adults and larvae of *Drosophila melanogaster* (Campbell et al.,  
673 2019). Thus, we propose that, compared to females, male locusts have higher levels of anaerobic  
674 glycolysis in the CNS during anoxia, which results in a slower CNS recovery (i.e., slower  
675 recovery of ventilatory rhythm generation).

676



677 *pH*

678 A major contributor to  $pH_o$  with  $CO_2$  anoxia is clearly the gas delivery generating  
679 carbonic acid and causing an immediate decrease of  $\sim 1$  pH unit. Nevertheless, with both  $CO_2$   
680 and  $N_2$  anoxia, a slower interstitial acidification was likely due to hyperactivity (Rasmussen et  
681 al., 2020) and anaerobic glycolysis with the production of protons. Restoration of  $pH_o$  was  
682 slower than restoration of  $[K^+]_o$  and was interrupted by transient acidification associated with the  
683 return of neural activity. Activity causes extracellular acidification in neural tissue (Chesler,  
684 2003; Magnotta et al., 2012; Xiong and Stringer, 2000) some of which is due to protons released  
685 by synaptic activity (Chiacchiaretta et al., 2017); synaptic vesicles are acidified by VA to  
686 facilitate transmitter loading (Mellman et al., 1986). In rat cortex, spreading depression and  
687 cerebral ischemia causes  $pH_o$  to drop from 7.33 to 6.97 and 6.75 units (respectively); restoration  
688 of  $pH_o$  after spreading depression parallels restoration of lactate levels (Mutch and Hansen,  
689 1984).

690 In our experiments the large decrease of  $pH_o$  induced by  $CO_2$  is unlikely to have caused  
691 the increased ventilatory frequency, which occurred immediately with  $N_2$  anoxia without any  
692  $pH_o$  change. Acidification of the hemolymph does not increase ventilation rate in grasshoppers  
693 (Gulinson and Harrison, 1996; Krolkowski and Harrison, 1996). In our semi-intact preparations,  
694 up to an hour of exposure to pH 3.5 saline had no effect on ventilatory rhythm frequency ( $n = 3$ ;  
695 RMR unpublished observations). However, the ganglion sheath is a very effective barrier to  
696 protons and these treatments may not have changed  $pH_o$ . Interstitial acidification generally  
697 reduces excitability of neurons and synaptic transmission (Chesler, 2003; Rasmussen et al.,  
698 2020; Tombaugh and Somjen, 1996), as we noted at the start of anoxia in intracellular neuron  
699 and muscle fibre recordings, and it is unlikely to be responsible for the hyperexcitability prior to  
700 coma onset. We found that inhibition of VA with bafilomycin, which would have slowed  
701 restoration of  $pH_o$ , shortened the time to rhythm failure and entry to coma and increased the time  
702 taken to restore motor pattern generation. This underlines the importance of pH homeostasis for  
703 proper CNS operation. Nevertheless, we do not know the effects of interstitial acidification on  
704 neural mechanisms in our preparation and it would be interesting to directly manipulate  $pH_o$  by  
705 injection across the ganglion sheath.

706

707 *Transperineurial potential*

708           The TPP is a convenient indicator of the occurrence and timing of SD. It depends on  
709 basolateral and adglial membrane potentials of the perineurial cells of the BBB (Schofield and  
710 Treherne, 1984). In turn, these depend on many different parameters that can vary independently  
711 of each other (ion concentrations of hemolymph, interstitium and cytosol; ion conductances of  
712 the two membranes; electrogenic activities of energy-dependent ion pumps). Thus, it may be  
713 misleading to focus on TPP dynamics as an indicator of failure and recovery of the CNS. What is  
714 functionally important in the CNS is the failure and recovery of synaptic transmission and action  
715 potential generation. The TPP has no intrinsic functional relevance but measuring the TPP can  
716 provide information about mechanisms that might underlie the failure and recovery of neural  
717 operation. Interpretation of TPP dynamics is complicated. The fact that it is negative during SD  
718 may be of no functional relevance apart from what it indicates about the adglial membrane  
719 potential depolarizing close to zero while the basolateral membrane maintains a negative  
720 membrane potential, indicating continuing integrity of the BBB.

721           The amplitude of the PAN of the TPP correlates positively with TPP recovery time  
722 because a larger initial negative excursion will necessarily delay the return of TPP to starting  
723 values, assuming the restoration rate is the same. Also, reduction of the PAN using bafilomycin  
724 to inhibit the VA shortened TPP recovery time, but it increased the time to recovery of  
725 ventilatory motor patterning (synaptic transmission). An interpretation is that the timing and  
726 slope of TPP recovery are determined by overlapping phenomena that are all restorative but push  
727 the TPP in different directions (e.g., negative shift for VA and positive shift for NKA). The TPP  
728 provides a good general indicator of when SD starts and stops but the details of its trajectory,  
729 including amplitude, need careful interpretation.

730           Intracellular recording with sharp electrodes relative to the bathing medium at ground  
731 ( $V_i$ ) is complicated by the changes of TPP induced by anoxia and SD. Under normoxia, the  
732 intracellular electrode can be zero-ed in the interstitium, after penetrating the sheath, and the  
733 resulting recording will be a faithful representation of  $V_m$  because small activity-dependent  
734 variation in TPP ( $V_o$ ) has negligible effect. The large changes of TPP during SD can not be  
735 ignored. This is complicated by the fact the TPP depends on both the basolateral and adglial  
736 membrane potentials, which can change independently. At SD, adglial and neuronal membranes  
737 both depolarize close to zero and the changes to  $V_m$  and  $V_o$  (TPP) will be equal and opposite,

738 cancelling each other out and resulting in almost no change in  $V_i$ . We did, however, notice a  
739 notch in the  $V_i$  recording at SD onset. This was always negative and more pronounced with CO<sub>2</sub>  
740 anoxia. We interpret this as being due to a slight mismatch in the timing of depolarization of the  
741 adglial and neuronal membranes. The fact that the notch was always negative indicates that the  
742 adglial membrane depolarizes first (negative shift of  $V_o$ ) followed several seconds later by the  
743 depolarization of the neuronal membrane (positive shift of  $V_m$ ). The fact that it was more  
744 noticeable with CO<sub>2</sub> anoxia is because this initially generates a more abrupt and larger neuronal  
745 depolarization providing a depolarization that enhances the appearance of the negative shift of  
746  $V_o$ . We propose that the wave of SD is initiated at the BBB, depolarizing glial membranes first,  
747 and propagates both laterally, generating latency differences of the negative DC shift, and more  
748 deeply, depolarizing neuronal membranes and generating the notch in the  $V_i$  recordings.

749 Constant current pulses delivered during a  $V_o$  recording showed that the electrical  
750 pathway from the interstitium to the bathing medium increased in resistance. This started  
751 gradually from around the time that motor patterning failed and increased more abruptly at SD  
752 onset, remaining steady during the coma, and returning to starting values with the return to  
753 normoxia. This could have been caused by conductance changes across or between the  
754 perineurial cells (not the adglial membrane, which is depolarized, presumably because of an  
755 increased conductance). An alternative explanation is that cell swelling (Spong et al., 2015),  
756 which occurs with SD and is the basis for optical recording of SD progression (Anderson and  
757 Andrew, 2002), compressed the extracellular pathway, increasing its resistance. At present, we  
758 suspect that both mechanisms have a role but cannot distinguish their relative importance.  
759 Nonetheless, these findings illustrate that the ganglion sheath remains an effective barrier, indeed  
760 increasing its efficacy, to the free flow of ions during SD.

761 Another complication of the  $V_i$  recording is evident when using the delivery of constant  
762 current pulses to characterize input resistance of neurons. The resistance changes in the  
763 extracellular pathway noted above contaminated the intracellular recordings and prevented stable  
764 balancing of the amplifier bridge circuit. In spite of that, we are confident that SD onset was  
765 associated with an abrupt decrease in the resistance of neuronal membranes as has been  
766 previously described in mammalian brain slices (Czéh et al., 1993) and for azide-induced SD in  
767 the locust metathoracic ganglion (Armstrong et al., 2009).

768

769 *Conclusions*

770 Our goal was to understand the mechanisms underlying the differences between the  
771 effects of water immersion or gas (N<sub>2</sub> or CO<sub>2</sub>) exposure for inducing anoxia in locusts. At the  
772 level of the CNS there was little difference between water immersion and N<sub>2</sub> exposure and whole  
773 animal differences can be attributed to characteristics of the tracheal system. Thus, the reservoir  
774 of air in the tracheae at the time of immersion prolongs the time to enter a coma. Recovery from  
775 water immersion may have been hindered by residual water collected in the spiracles.

776 Whole animal recovery was quickest after CO<sub>2</sub> anoxia. Given that this was not evident in  
777 the CNS, where recovery from CO<sub>2</sub> was slowest, the difference must be due to peripheral  
778 mechanisms. An explanation is provided by the anesthetic effects of CO<sub>2</sub> inhibiting  
779 neuromuscular transmission by decreasing the sensitivity of glutamate receptors (Badre et al.,  
780 2005). Rapid shutdown of neuromuscular transmission would prevent depletion of transmitter at  
781 neuromuscular junctions allowing a more rapid functional recovery. There may be other  
782 differences within muscle fibres that are protected by early paralysis to promote recovery of  
783 muscle strength.

784 The effect of CO<sub>2</sub> on the whole animal resembles in some fashion the effect of muscle  
785 relaxants in the context of electroconvulsive therapy for humans; although there is sudden and  
786 uncoordinated hyperactivity of neurons, this is not evident in the behaviour of the animal. All our  
787 results show that, compared with N<sub>2</sub>, CO<sub>2</sub> causes an immediate and more extreme  
788 hyperexcitability and greater interstitial acidification from which it takes longer to recover. There  
789 was no obvious difference in the characteristics of SD itself and it is pertinent that although CO<sub>2</sub>  
790 hastened the onset of SD it did not alter the propagation speed. It is tempting to ascribe the  
791 differences in excitability and SD onset to the substantial acidification cause by CO<sub>2</sub>, but we do  
792 not yet have direct evidence to make that connection. Also, it is worth considering that the CO<sub>2</sub>  
793 treatment is more severe in the sense that the concentration changes suddenly from 0.04% in air  
794 to 100%, in addition to 0 % O<sub>2</sub>, whereas with N<sub>2</sub> the change is primarily in the loss of O<sub>2</sub>.  
795 Arguably, it is to be expected that the consequences, although essentially the same, would be  
796 more severe with CO<sub>2</sub>. The mechanisms underlying anoxic SD in the CNS were not noticeably  
797 different with the different methods of anoxia. Future research will focus on how events at the  
798 perineurial glial layer trigger SD that propagates deeper into the neuropil.

799

800 **Acknowledgements**

801           We thank Laura Dwyer for collecting the data in Figure 1 and Mike O'Donnell for  
802 suggestions about ion-sensitive electrode recording and the V-ATPase. We also thank Mads  
803 Andersen, David Andrew, Heath MacMillan, Chris Moyes, Mike O'Donnell and Yuyang Wang  
804 for their comments on a previous version of the manuscript. Funded by a Discovery Grant from  
805 the Natural Sciences and Engineering Research Council of Canada.

806

807 **References**

- 808 **Anderson, T. R. and Andrew, R. D.** (2002). Spreading depression: imaging and  
809 blockade in the rat neocortical brain slice. *J Neurophysiol* **88**, 2713-25.
- 810 **Andrew, R. D., Robertson, R. M., Revah, O., Ullah, G., Farkas, E., Muller, M.,**  
811 **Ollen-Bittle, N., Hartings, J. A., Shuttleworth, C. M., Brennan, K. C. et al.** (2021). Spreading  
812 depolarization: consensus, contention, and questioning the role of glutamate excitotoxicity in  
813 brain damage. *Neurocrit Care* (submitted).
- 814 **Armstrong, G. A. B., Rodgers, C. I., Money, T. G. A. and Robertson, R. M.** (2009).  
815 Suppression of spreading depression-like events in locusts by inhibition of the NO/cGMP/PKG  
816 pathway. *J Neurosci.* **29**, 8225-8235.
- 817 **Armstrong, G. A. B., Shoemaker, K. L., Money, T. G. A. and Robertson, R. M.**  
818 (2006). Octopamine mediates thermal preconditioning of the locust ventilatory central pattern  
819 generator via a cAMP/protein kinase A signaling pathway. *J Neurosci* **26**, 12118-12126.
- 820 **Attwell, D. and Laughlin, S. B.** (2001). An energy budget for signaling in the grey  
821 matter of the brain. *J Cereb Blood Flow Metab* **21**, 1133-45.
- 822 **Badre, N. H., Martin, M. E. and Cooper, R. L.** (2005). The physiological and  
823 behavioral effects of carbon dioxide on *Drosophila melanogaster* larvae. *Comp Biochem Physiol*  
824 *A Mol Integr Physiol* **140**, 363-76.
- 825 **Benasayag-Mezaros, R., Risley, M. G., Hernandez, P., Fendrich, M. and Dawson-**  
826 **Scully, K.** (2015). Pushing the limit: examining factors that affect anoxia tolerance in a single  
827 genotype of adult *D. melanogaster*. *Sci Rep* **5**, 9204.
- 828 **Brust, M. L., Hoback, W. W., Skinner, K. F. and Knisley, C. B.** (2005). Differential  
829 immersion survival by populations of *Cicindela hirticollis* (Coleoptera : Cicindelidae). *Annals of*  
830 *the Entomological Society of America* **98**, 973-979.
- 831 **Brust, M. L., Hoback, W. W. and Wright, R. J.** (2007). Immersion tolerance in  
832 rangeland grasshoppers (Orthoptera: Acrididae). *Journal of Orthoptera Research* **16**, 135-138.
- 833 **Bustami, H. P., Harrison, J. F. and Hustert, R.** (2002). Evidence for oxygen and  
834 carbon dioxide receptors in insect CNS influencing ventilation. *Comparative Biochemistry and*  
835 *Physiology a-Molecular and Integrative Physiology* **133**, 595-604.
- 836 **Bustami, H. P. and Hustert, R.** (2000). Typical ventilatory pattern of the intact locust is  
837 produced by the isolated CNS. *J Insect Physiol* **46**, 1285-1293.
- 838 **Campbell, J. B., Andersen, M. K., Overgaard, J. and Harrison, J. F.** (2018). Paralytic  
839 hypo-energetic state facilitates anoxia tolerance despite ionic imbalance in adult *Drosophila*  
840 *melanogaster*. *J Exp Biol.* **221**, jeb177147.
- 841 **Campbell, J. B., Werkhoven, S. and Harrison, J. F.** (2019). Metabolomics of anoxia  
842 tolerance in *Drosophila melanogaster*: evidence against substrate limitation and for roles of  
843 protective metabolites and paralytic hypometabolism. *Am J Physiol Regul Integr Comp Physiol*  
844 **317**, R442-R450.
- 845 **Chesler, M.** (2003). Regulation and modulation of pH in the brain. *Physiol Rev* **83**, 1183-  
846 221.
- 847 **Chiacchiaretta, M., Latifi, S., Bramini, M., Fadda, M., Fassio, A., Benfenati, F. and**  
848 **Cesca, F.** (2017). Neuronal hyperactivity causes Na<sup>(+)</sup>/H<sup>(+)</sup> exchanger-induced extracellular  
849 acidification at active synapses. *J Cell Sci* **130**, 1435-1449.
- 850 **Colinet, H. and Renault, D.** (2012). Metabolic effects of CO<sub>2</sub> anaesthesia in  
851 *Drosophila melanogaster*. *Biol Lett* **8**, 1050-4.

- 852 **Czéh, G., Aitken, P. G. and Somjen, G. G.** (1993). Membrane currents in CA1  
853 pyramidal cells during spreading depression (SD) and SD-like hypoxic depolarization. *Brain Res*  
854 **632**, 195-208.
- 855 **Dreier, J. P. and Reiffurth, C.** (2015). The stroke-migraine depolarization continuum.  
856 *Neuron* **86**, 902-22.
- 857 **Evans, A. M.** (2019). AMPK breathing and oxygen supply. *Respir Physiol Neurobiol*  
858 **265**, 112-120.
- 859 **Evans, A. M. and Hardie, D. G.** (2020). AMPK and the Need to Breathe and Feed:  
860 What's the Matter with Oxygen? *Int J Mol Sci* **21**.
- 861 **Gee, C. E. and Robertson, R. M.** (1994). Effects of maturation on synaptic potentials in  
862 the locust flight system. *J. Comp. Physiol. A* **175**, 437-447.
- 863 **Gulinson, S. and Harrison, J.** (1996). Control of resting ventilation rate in grasshoppers.  
864 *J Exp Biol* **199**, 379-89.
- 865 **Harrison, J. F., Waser, W. and Hetz, S. K.** (2020). PO<sub>2</sub> of the metathoracic ganglion in  
866 response to progressive hypoxia in an insect. *Biol Lett* **16**, 20200548.
- 867 **Harrison, J. F., Waters, J. S., Cease, A. J., VandenBrooks, J. M., Callier, V., Klok,**  
868 **C. J., Shaffer, K. and Socha, J. J.** (2013). How Locusts Breathe. *Physiology* **28**, 18-27.
- 869 **Hoback, W. W.** (2012). Ecological and experimental exposure of insects to anoxia reveal  
870 surprising tolerance. In *Anoxia: Evidence for Eukaryote Survival and Paleontological Strategies*,  
871 eds. A. Altenback J. M. Bernhaard and J. Seckbach), pp. 169 - 188. Netherlands: Springer.
- 872 **Hoback, W. W. and Stanley, D. W.** (2001). Insects in hypoxia. *J Insect Physiol* **47**, 533-  
873 542.
- 874 **Hochachka, P. W.** (1986a). Defense strategies against hypoxia and hypothermia. *Science*  
875 **231**, 234-41.
- 876 **Hochachka, P. W.** (1986b). Metabolic arrest. *Intensive Care Med* **12**, 127-33.
- 877 **Hochachka, P. W., Nener, J. C., Hoar, J., Saurez, R. K. and Hand, S. C.** (1993).  
878 Disconnecting metabolism from adenylate control during extreme oxygen limitation. *Canadian*  
879 *Journal of Zoology* **71**, 1267-1270.
- 880 **Hou, N., Armstrong, G. A. B., Chakraborty-Chatterjee, M., Sokolowski, M. B. and**  
881 **Robertson, R. M.** (2014). Na<sup>+</sup>-K<sup>+</sup>-ATPase trafficking induced by heat shock pretreatment  
882 correlates with increased resistance to anoxia in locusts. *J Neurophysiol* **112**, 814-823.
- 883 **Jonz, M. G., Buck, L. T., Perry, S. F., Schwerte, T. and Zaccone, G.** (2016). Sensing  
884 and surviving hypoxia in vertebrates. *Ann N Y Acad Sci* **1365**, 43-58.
- 885 **Kocmarek, A. L. and O'Donnell, M. J.** (2011). Potassium fluxes across the blood brain  
886 barrier of the cockroach, *Periplaneta americana*. *J Insect Physiol* **57**, 127-35.
- 887 **Krolkowski, K. and Harrison, J.** (1996). Haemolymph acid-base status, tracheal gas  
888 levels and the control of post-exercise ventilation rate in grasshoppers. *J Exp Biol* **199**, 391-9.
- 889 **Lighton, J. R. and Schilman, P. E.** (2007). Oxygen reperfusion damage in an insect.  
890 *Plos One* **2**, e1267.
- 891 **Lindquist, B. E. and Shuttleworth, C. W.** (2012). Adenosine receptor activation is  
892 responsible for prolonged depression of synaptic transmission after spreading depolarization in  
893 brain slices. *Neuroscience* **223**, 365-76.
- 894 **Lindquist, B. E. and Shuttleworth, C. W.** (2017). Evidence that adenosine contributes  
895 to Leao's spreading depression in vivo. *J Cereb Blood Flow Metab* **37**, 1656-1669.

- 896 **Ma, E., Gu, X. Q., Wu, X., Xu, T. and Haddad, G. G.** (2001). Mutation in pre-mRNA  
897 adenosine deaminase markedly attenuates neuronal tolerance to O<sub>2</sub> deprivation in *Drosophila*  
898 *melanogaster*. *J Clin Invest* **107**, 685-93.
- 899 **MacMillan, H. A., Norgard, M., MacLean, H. J., Overgaard, J. and Williams, C. J.**  
900 **A.** (2017). A critical test of *Drosophila* anaesthetics: Isoflurane and sevoflurane are benign  
901 alternatives to cold and CO<sub>2</sub>. *J Insect Physiol* **101**, 97-106.
- 902 **Magnotta, V. A., Heo, H. Y., Dlouhy, B. J., Dahdaleh, N. S., Follmer, R. L., Thedens,**  
903 **D. R., Welsh, M. J. and Wemmie, J. A.** (2012). Detecting activity-evoked pH changes in  
904 human brain. *Proc Natl Acad Sci U S A* **109**, 8270-3.
- 905 **Mellman, I., Fuchs, R. and Helenius, A.** (1986). Acidification of the endocytic and  
906 exocytic pathways. *Annu Rev Biochem* **55**, 663-700.
- 907 **Michel, R. and Wegener, G.** (1982). Metabolic effects of anoxia in the central nervous  
908 system of the locust (*Locusta migratoria*). *Hoppe-Seylers Zeitschrift Fur Physiologische Chemie*  
909 **363**, 1310-1310.
- 910 **Milton, C. C. and Partridge, L.** (2008). Brief carbon dioxide exposure blocks heat  
911 hardening but not cold acclimation in *Drosophila melanogaster*. *J Insect Physiol* **54**, 32-40.
- 912 **Money, T. G. A., Sproule, M. K. J., Hamour, A. F. and Robertson, R. M.** (2014).  
913 Reduction in neural performance following recovery from anoxic stress Is mimicked by AMPK  
914 pathway activation. *Plos One* **9**.
- 915 **Mutch, W. A. and Hansen, A. J.** (1984). Extracellular pH changes during spreading  
916 depression and cerebral ischemia: mechanisms of brain pH regulation. *J Cereb Blood Flow*  
917 *Metab* **4**, 17-27.
- 918 **Ortega-Saenz, P. and Lopez-Barneo, J.** (2020). Physiology of the Carotid Body: From  
919 Molecules to Disease. *Annu Rev Physiol* **82**, 127-149.
- 920 **Ortega-Saenz, P., Moreno-Dominguez, A., Gao, L. and Lopez-Barneo, J.** (2020).  
921 Molecular Mechanisms of Acute Oxygen Sensing by Arterial Chemoreceptor Cells. Role of  
922 Hif2alpha. *Frontiers in Physiology* **11**, 614893.
- 923 **Pacey, E. K. and O'Donnell, M. J.** (2014). Transport of H(+), Na(+) and K(+) across the  
924 posterior midgut of blood-fed mosquitoes (*Aedes aegypti*). *J Insect Physiol* **61**, 42-50.
- 925 **Perron, J. M., Huot, L., Corriveau, G. W. and Chawla, S. S.** (1972). Effects of carbon  
926 dioxide anaesthesia on *Drosophila melanogaster*. *J Insect Physiol* **18**, 1869-74.
- 927 **Pietrobon, D. and Moskowitz, M. A.** (2014). Chaos and commotion in the wake of  
928 cortical spreading depression and spreading depolarizations. *Nat Rev Neurosci* **15**, 379-93.
- 929 **Plum, N.** (2005). Terrestrial invertebrates in flooded grassland: A literature review.  
930 *Wetlands* **25**, 721-737.
- 931 **Rasmussen, R., O'Donnell, J., Ding, F. and Nedergaard, M.** (2020). Interstitial ions: A  
932 key regulator of state-dependent neural activity? *Prog Neurobiol* **193**, 101802.
- 933 **Ravn, M. V., Campbell, J. B., Gerber, L., Harrison, J. F. and Overgaard, J.** (2019).  
934 Effects of anoxia on ATP, water, ion and pH balance in an insect (*Locusta migratoria*). *J Exp*  
935 *Biol* **222**.
- 936 **Rittschof, C. C. and Schirmeier, S.** (2018). Insect models of central nervous system  
937 energy metabolism and its links to behavior. *Glia* **66**, 1160-1175.
- 938 **Rittschof, C. C., Vekaria, H. J., Palmer, J. H. and Sullivan, P. G.** (2019). Biogenic  
939 amines and activity levels alter the neural energetic response to aggressive social cues in the  
940 honey bee *Apis mellifera*. *J Neurosci Res* **97**, 991-1003.



- 941           **Robertson, R. M.** (2017). The origin of the 'channel arrest' hypothesis. *J Exp Biol* **220**,  
942 1747-1748.
- 943           **Robertson, R. M., Cease, A. J. and Simpson, S. J.** (2019). Anoxia tolerance of the adult  
944 Australian Plague Locust (*Chortoicetes terminifera*). *Comp Biochem Physiol A Mol Integr*  
945 *Physiol* **229**, 81-92.
- 946           **Robertson, R. M., Dawson-Scully, K. D. and Andrew, R. D.** (2020). Neural shutdown  
947 under stress: an evolutionary perspective on spreading depolarization. *J Neurophysiol* **123**, 885-  
948 895.
- 949           **Robertson, R. M. and Pearson, K. G.** (1982). A preparation for the intracellular  
950 analysis of neuronal activity during flight in the locust. *J. Comp. Physiol. A* **146**, 311-320.
- 951           **Robertson, R. M., Spong, K. E. and Srithiphaphirom, P.** (2017). Chill coma in the  
952 locust, *Locusta migratoria*, is initiated by spreading depolarization in the central nervous  
953 system. *Sci Rep* **7**, 10297.
- 954           **Rodgers-Garlick, C. I., Armstrong, G. A. B. and Robertson, R. M.** (2011). Metabolic  
955 Stress Modulates Motor Patterning via AMP-Activated Protein Kinase. *J Neurosci* **31**, 3207-  
956 3216.
- 957           **Rodgers, C. I., Armstrong, G. A. B. and Robertson, R. M.** (2010). Coma in response  
958 to environmental stress in the locust: A model for cortical spreading depression. *J Insect Physiol*  
959 **56**, 980-990.
- 960           **Rodgers, C. I., Armstrong, G. A. B., Shoemaker, K. L., LaBrie, J. D., Moyes, C. D.**  
961 **and Robertson, R. M.** (2007). Stress Preconditioning of Spreading Depression in the Locust  
962 CNS. *Plos One* **2**.
- 963           **Ruggiero, A., Katsenelson, M. and Slutsky, I.** (2021). Mitochondria: new players in  
964 homeostatic regulation of firing rate set points. *Trends Neurosci* **xx**, (in press).
- 965           **Schofield, P. K. and Treherne, J. E.** (1984). Localization of the Blood-Brain-Barrier of  
966 an Insect - Electrical Model and Analysis. *J Exp Biol* **109**, 319-331.
- 967           **Shuttleworth, C. W., Andrew, R. D., Akbari, Y., Ayata, C., Balu, R., Brennan, K. C.,**  
968 **Boutelle, M., Carlson, A. P., Dreier, J. P., Fabricius, M. et al.** (2019). Which Spreading  
969 Depolarizations are deleterious to brain tissue? *Neurocrit Care*.
- 970           **Smith, P. J. S. and Shipley, A.** (1990). Regional Variation in the Current Flow across an  
971 Insect Blood-Brain-Barrier. *J Exp Biol* **154**, 371-382.
- 972           **Snodgrass, R. E.** (1929). The thoracic mechanism of a grasshopper and its antecedents.  
973 *Smithson Misc Collect* **82**, 1-111.
- 974           **Spong, K. E., Andrew, R. D. and Robertson, R. M.** (2016a). Mechanisms of spreading  
975 depolarization in vertebrate and insect central nervous systems. *J Neurophysiol* **116**, 1117-27.
- 976           **Spong, K. E., Chin, B., Witiuk, K. L. M. and Robertson, R. M.** (2015). Cell swelling  
977 increases the severity of spreading depression in *Locusta migratoria*. *J Neurophysiol* **114**, 3111-  
978 3120.
- 979           **Spong, K. E., Dreier, J. P. and Robertson, R. M.** (2017). A new direction for spreading  
980 depolarization: Investigation in the fly brain. *Channels (Austin)* **11**, 97-98.
- 981           **Spong, K. E., Rodriguez, E. C. and Robertson, R. M.** (2016b). Spreading  
982 depolarization in the brain of *Drosophila* is induced by inhibition of the Na<sup>+</sup>/K<sup>+</sup>-ATPase and  
983 mitigated by a decrease in activity of protein kinase G. *J Neurophysiol* **116**, 1152-60.
- 984           **Talal, S., Ayali, A. and Gefen, E.** (2019). Respiratory gas levels interact to control  
985 ventilatory motor patterns in isolated locust ganglia. *J Exp Biol* **222**.

- 986 **Tamim, I., Chung, D. Y., de Morais, A. L., Loonen, I. C. M., Qin, T., Misra, A.,**  
987 **Schlunk, F., Endres, M., Schiff, S. J. and Ayata, C.** (2021). Spreading depression as an innate  
988 antiseizure mechanism. *Nat Commun* **12**, 2206.
- 989 **Tombaugh, G. C. and Somjen, G. G.** (1996). Effects of extracellular pH on voltage-  
990 gated Na<sup>+</sup>, K<sup>+</sup> and Ca<sup>2+</sup> currents in isolated rat CA1 neurons. *J Physiol* **493 ( Pt 3)**, 719-32.
- 991 **Van Dusen, R. A., Lanz, C. and Robertson, R. M.** (2020a). Role of adenosine in  
992 functional recovery following anoxic coma in *Locusta migratoria*. *J Insect Physiol* **124**, 104057.
- 993 **Van Dusen, R. A., Shuster-Hyman, H. and Robertson, R. M.** (2020b). Inhibition of  
994 ATP-sensitive potassium channels exacerbates anoxic coma in *Locusta migratoria*. *J*  
995 *Neurophysiol* **124**, 1754-1765.
- 996 **Wegener, G. and Moratzky, T.** (1995). Hypoxia and Anoxia in Insects -  
997 Microcalorimetric Studies on 2 Species (*Locusta-Migratoria* and *Manduca-Sexta*) Showing  
998 Different Degrees of Anoxia Tolerance. *Thermochimica Acta* **251**, 209-218.
- 999 **Weyel, W. and Wegener, G.** (1996). Adenine nucleotide metabolism during anoxia and  
1000 postanoxic recovery in insects. *Experientia* **52**, 474-480.
- 1001 **Woodman, J. D.** (2013). Temperature affects immersion tolerance of first-instar nymphs  
1002 of the Australian plague locust, *Chortoicetes terminifera*. *Australian Journal of Zoology* **61**, 328-  
1003 331.
- 1004 **Woodman, J. D.** (2015). Surviving a flood: effects of inundation period, temperature and  
1005 embryonic development stage in locust eggs. *Bulletin of Entomological Research* **105**, 441-447.
- 1006 **Woodring, J. P., Clifford, C. W., Roe, R. M. and Beckman, B. R.** (1978). Effects of  
1007 CO<sub>2</sub> and anoxia on feeding, growth, metabolism, water balance, and blood composition in larval  
1008 female house crickets, *Acheta domesticus*. *J Insect Physiol* **24**, 499-509.
- 1009 **Woods, H. A. and Lane, S. J.** (2016). Metabolic recovery from drowning by insect  
1010 pupae. *J Exp Biol* **219**, 3126-3136.
- 1011 **Wu, B. S., Lee, J. K., Thompson, K. M., Walker, V. K., Moyes, C. D. and Robertson,**  
1012 **R. M.** (2002). Anoxia induces thermotolerance in the locust flight system. *J Exp Biol* **205**, 815-  
1013 827.
- 1014 **Xiao, C., Bayat Fard, N., Brzezinski, K., Robertson, R. M. and Chippindale, A. K.**  
1015 (2019). Experimental evolution of response to anoxia in *Drosophila melanogaster*: recovery of  
1016 locomotion following CO<sub>2</sub> or N<sub>2</sub> exposure. *J Exp Biol* **222**.
- 1017 **Xiao, C. and Robertson, R. M.** (2016). Timing of Locomotor Recovery from Anoxia  
1018 Modulated by the white Gene in *Drosophila*. *Genetics* **203**, 787-97.
- 1019 **Xiao, C. and Robertson, R. M.** (2017). White - cGMP Interaction Promotes Fast  
1020 Locomotor Recovery from Anoxia in Adult *Drosophila*. *Plos One* **12**, e0168361.
- 1021 **Xiong, Z. Q. and Stringer, J. L.** (2000). Extracellular pH responses in CA1 and the  
1022 dentate gyrus during electrical stimulation, seizure discharges, and spreading depression. *J*  
1023 *Neurophysiol* **83**, 3519-24.
- 1024

1025 **Figure Legends**

1026 **Figure 1 – Timing of entry to, and recovery from, anoxic coma of whole animals depends**  
1027 **on method of anoxia. A.** Time taken for locusts, including males and females, to  
1028 succumb to anoxia and enter a coma after immersion in water or exposure to nitrogen or  
1029 carbon dioxide gas. **B.** Time taken for ventilation movements of the abdomen to start  
1030 after return to air. **C.** Time taken for the locust to stand after return to air. Box plots  
1031 indicate the median, 25<sup>th</sup> and 75<sup>th</sup> percentiles with whiskers to the 10<sup>th</sup> and 90<sup>th</sup>  
1032 percentiles. Individual data points plotted as open symbols. Statistically significant  
1033 differences indicated with different letters.

1034 **Figure 2 – Neuromuscular failure is more rapid with CO<sub>2</sub> anoxia. A.** Sample EMG traces  
1035 from male locusts during exposure to different agents of anoxia starting at the beginning  
1036 of the recording. Open arrows indicate failure of rhythmic ventilatory activity; red arrows  
1037 indicate the beginning of electrical silence characteristic of coma. **B.** Time to rhythm  
1038 failure is shorter with CO<sub>2</sub>. **C.** Time to enter coma is shorter with CO<sub>2</sub>. Box plots indicate  
1039 the median, 25<sup>th</sup> and 75<sup>th</sup> percentiles with whiskers to the 10<sup>th</sup> and 90<sup>th</sup> percentiles.  
1040 Individual data points plotted as open symbols. Statistically significant differences  
1041 indicated with different letters.

1042 **Figure 3 – Neuromuscular recovery depends on method of anoxia. A.** Sample EMG traces  
1043 from male locusts recovering after exposure to different agents of anoxia. Air returns at  
1044 the beginning of the recording. Red arrows indicate the recovery of electrical excitability;  
1045 open arrows indicate recovery of rhythmic ventilatory activity. Note that the recovery of  
1046 ventilatory motor patterning can be difficult to identify, particularly in these compressed  
1047 traces. **B.** Time to recover excitability. **C.** Time to recover rhythmicity. **D.** Relative  
1048 duration of ventilatory motor bursts compared with starting values. **E.** Relative frequency  
1049 of the ventilatory motor pattern compared with starting values. Box plots indicate the  
1050 median, 25<sup>th</sup> and 75<sup>th</sup> percentiles with whiskers to the 10<sup>th</sup> and 90<sup>th</sup> percentiles. Individual  
1051 data points plotted as open symbols. Statistically significant differences indicated with  
1052 different letters.

1053 **Figure 4 – CNS shutdown and recovery are associated with characteristic changes of the**  
1054 **transperineurial potential (TPP).** Recordings made during coma onset and recovery  
1055 due to treatment with **A.** H<sub>2</sub>O, **B.** N<sub>2</sub> and **C.** CO<sub>2</sub>. Treatment duration is indicated by the

1056 lines under the traces. SD onset is indicated by the red arrow. The voltage scale bar is for  
1057 the TPP trace and is the same for all panels.

1058 **Figure 5 – CNS shutdown is faster, and recovery is slower with CO<sub>2</sub> anoxia.** Entry to and  
1059 recovery from a ~1 min coma induced different methods of anoxia characterized by **A.**  
1060 Time to rhythm failure, **B.** Time to SD (negative DC shift), **C.** Time to rhythm recovery,  
1061 **D.** Time to TPP recovery (positive DC shift), **E.** Amplitude of the TPP shift, **F.** Slope of  
1062 the TPP returning to normal. Box plots indicate the median, 25<sup>th</sup> and 75<sup>th</sup> percentiles with  
1063 whiskers to the 10<sup>th</sup> and 90<sup>th</sup> percentiles. Individual data points plotted as open symbols.  
1064 Statistically significant differences indicated with different letters.

1065 **Figure 6 – CO<sub>2</sub> onset induces abrupt interstitial pH decrease.** **A.** Recording ventilatory  
1066 rhythm from a median nerve (top) and interstitial pH<sub>o</sub> from the neuropil (bottom) at the  
1067 onset of N<sub>2</sub> anoxia. **B.** Same for the onset of CO<sub>2</sub> anoxia. **C.** Nerve recording, negative  
1068 DC shift (V<sub>o</sub>) and pH<sub>o</sub> before, during and after N<sub>2</sub> anoxia with a 1 minute coma. **D.** Same  
1069 for CO<sub>2</sub> anoxia. Timing of gas delivery indicated by lines under the traces. Note the  
1070 discontinuity of pH<sub>o</sub> recovery indicated by the dotted lines. **E.** In a different preparation,  
1071 discontinuous pH<sub>o</sub> recovery is coincident with recovery of excitability. The traces start 30  
1072 s after the return of air following a 1 min CO<sub>2</sub> anoxia. **F.** Comparison of pH changes  
1073 with N<sub>2</sub> and CO<sub>2</sub> anoxia. Box plots indicate the median, 25<sup>th</sup> and 75<sup>th</sup> percentiles with  
1074 whiskers to the 10<sup>th</sup> and 90<sup>th</sup> percentiles. Individual data points plotted as open symbols.  
1075 Statistically significant differences indicated with different letters.

1076 **Figure 7 – CO<sub>2</sub> onset induces abrupt [K<sup>+</sup>]<sub>o</sub> increase.** **A.** Recording ventilatory rhythm from a  
1077 median nerve (top) and [K<sup>+</sup>]<sub>o</sub> from the neuropil (bottom) at the onset of N<sub>2</sub> anoxia. **B.**  
1078 Same for the onset of CO<sub>2</sub> anoxia. **C.** Nerve recording, negative DC shift (V<sub>o</sub>) and [K<sup>+</sup>]<sub>o</sub>  
1079 before, during and after N<sub>2</sub> anoxia with a 1 minute coma. **D.** Same for CO<sub>2</sub> anoxia.  
1080 Timing of gas delivery indicated by lines under the traces. **E, F, G.** Comparison of [K<sup>+</sup>]<sub>o</sub>  
1081 changes with N<sub>2</sub> and CO<sub>2</sub> anoxia. Box plots indicate the median, 25<sup>th</sup> and 75<sup>th</sup> percentiles  
1082 with whiskers to the 10<sup>th</sup> and 90<sup>th</sup> percentiles. Individual data points plotted as open  
1083 symbols.

1084 **Figure 8 – SD propagation and the postanoxic negativity.** **A.** Overlaid TPP recordings taken  
1085 from two locations separated by ~0.75 mm during a 5 min N<sub>2</sub> anoxia. The asterisk  
1086 indicates the onset of SD, which is not simultaneous at the two locations suggesting

1087 propagation between the electrodes. The red arrow indicates a prominent postanoxic  
1088 negativity (PAN) when air returned. **B.** Same for CO<sub>2</sub> anoxia. Note in **A** and **B** that the  
1089 effects of gas on and gas off are simultaneous at the two recording sites. **C.** PAN was  
1090 larger in males. **D.** PAN was larger with longer durations of coma. **E.** TPP recordings  
1091 during 5 mins of N<sub>2</sub> coma at different times (10, 20 and 40 mins) after bathing the  
1092 preparation with 10 mM ouabain. The dotted line at 0 mV relates only to the 10 min  
1093 trace. The two other traces have each been negatively displaced by ~5 mV for clarity but  
1094 are at the same scale. Note that after 40 mins of ouabain there is no negative shift of TPP  
1095 with N<sub>2</sub> onset but the PAN on return to air remains and is larger than at previous time  
1096 points. **F.** Sample voltage traces from the ion-sensitive electrodes and TPP showing that  
1097 the PAN is not associated with any change in [K<sup>+</sup>]<sub>o</sub> but is associated with a transient  
1098 increase of [H<sup>+</sup>]<sub>o</sub>. The red vertical lines are aligned with the onset of the PAN. Box plots  
1099 in C and D indicate the median, 25<sup>th</sup> and 75<sup>th</sup> percentiles with whiskers to the 10<sup>th</sup> and  
1100 90<sup>th</sup> percentiles. Individual data points plotted as open symbols. Statistically significant  
1101 differences indicated with different letters.

1102 **Figure 9 – Bafilomycin eradicates the PAN.** **A.** Nerve and TPP recordings during 3 repeated  
1103 10 min CO<sub>2</sub> anoxias. **i.** Control preparation **ii.** Experimental preparation in which 10 μM  
1104 bafilomycin was added to the saline between the first and second anoxia (solid arrow).  
1105 Note that bafilomycin application was followed by a positive DC shift of TPP (open  
1106 arrow) and that the PAN (circled) was eradicated after bafilomycin treatment. **B.** Overlaid  
1107 traces of the PAN with repetitive 10 min N<sub>2</sub> anoxias at different times after treatment  
1108 with ouabain and then bafilomycin. Trace 1 – pre-ouabain; trace 2 – 18 mins after 10 mM  
1109 ouabain; trace 3 – 34 mins after ouabain; trace 4 – 45 mins after ouabain; trace 5 – 68  
1110 mins after ouabain and 17 mins after bafilomycin. Note that ouabain accentuated the  
1111 PAN (black arrow) and bafilomycin subsequently eradicated it (red arrow). **C.** PAN  
1112 amplitude for first and second anoxias in control experiments and experiments in which  
1113 bafilomycin had been applied between the first and second anoxias. Box plots indicate  
1114 the median, 25<sup>th</sup> and 75<sup>th</sup> percentiles with whiskers to the 10<sup>th</sup> and 90<sup>th</sup> percentiles.  
1115 Individual data points plotted as open symbols. Statistically significant differences  
1116 indicated with different letters.

1117 **Figure 10 – Bafilomycin hastens anoxic coma and delays recovery.** Comparison of the time  
1118 course of failure and recovery with two anoxias in control preparations and before and  
1119 after 10  $\mu$ M bafilomycin. Percent changes in: **A.** Time to failure of the ventilatory  
1120 rhythm. **B.** Time to SD onset. **C.** Time to recovery of the TPP after return to air. **D.** Time  
1121 to recovery of the ventilatory rhythm. Box plots indicate the median, 25<sup>th</sup> and 75<sup>th</sup>  
1122 percentiles with whiskers to the 10<sup>th</sup> and 90<sup>th</sup> percentiles. Individual data points plotted as  
1123 open symbols. Statistically significant differences indicated with different letters.

1124 **Figure 11 – Muscle cells depolarize prior to SD.** Recordings from a fibre of the posterior  
1125 rotator of the mesothoracic coxa and the TPP during 1-minute comas induced by N<sub>2</sub> and  
1126 then by CO<sub>2</sub>.

1127 **Figure 12 – Motoneurons depolarize in two stages.** **A.** The recording arrangement. The  
1128 membrane potential of the motoneuron dendrite ( $V_m$ ) was derived from the intracellular  
1129 potential ( $V_i$ ) minus the extracellular potential ( $V_o$ ), both recorded relative to the saline  
1130 ground.  $V_o$  is the transperineurial potential (TPP) generated by the potentials across the  
1131 basolateral ( $V_b$ ) and apical ( $V_a$ ) membranes of perineurial cells. **B. i.** Intracellular  
1132 recording from a wing elevator muscle motoneuron and a median nerve at the onset of N<sub>2</sub>  
1133 delivery (arrow), prior to SD. The red vertical line indicates the time at which motor  
1134 patterning fails in the median nerve and motoneuronal firing becomes tonic. **ii.** Expanded  
1135 portion (a) of the traces in **i.** Note the flight-like bursting activity of the motoneuron and  
1136 the increasing burst strength of the ventilatory rhythm. **C.** Intracellular recordings from a  
1137 wing muscle motoneuron, a median nerve and the TPP during **i.** N<sub>2</sub> anoxia and **ii.** CO<sub>2</sub>  
1138 anoxia showing two stages of depolarization. **i** and **ii** are from different preparations.

1139 **Figure 13 – Input resistance recordings.** **A.** Constant current pulses delivered to TPP ( $V_o$ )  
1140 recordings for a 1-minute (upper) and a 10-minute (lower) N<sub>2</sub> anoxia. Traces start at the  
1141 onset of N<sub>2</sub>. The red lines indicate when motor patterning fails in a median nerve (not  
1142 shown). Note the increases in sheath  $R_{in}$ , indicated by the increased voltage deflections,  
1143 that remains constant during the comas. **B. i.** Intracellular recording relative to ground  
1144 ( $V_i$ ) from a wing muscle motoneuron at the onset of CO<sub>2</sub>-induced SD. Same recording as  
1145 shown in Fig. 11Cii, which is the derived  $V_m$  after subtracting  $V_o$  (TPP). Note the notch  
1146 in the recording at the time of SD onset. **ii.** A different preparation with constant current  
1147 pulses. **iii.** Expansion of **ii** indicating action potentials generated by post-inhibitory

1148 rebound (asterisks) and the failure of synaptic transmission (open arrow). **iv.** Expansion  
1149 of **ii** indicating the change in the voltage responses to constant current pulses at the onset  
1150 of SD. **v.** Overlaid voltage responses to constant current pulses prior to anoxia (lowest,  
1151 with synaptic potentials) and around SD onset (the first 4 pulses in **iv**). Note the decrease  
1152 in amplitude indicating decreased  $R_{in}$  of the neuron and the abrupt amplitude increase  
1153 indicating loss of bridge balance.  
1154  
1155  
1156

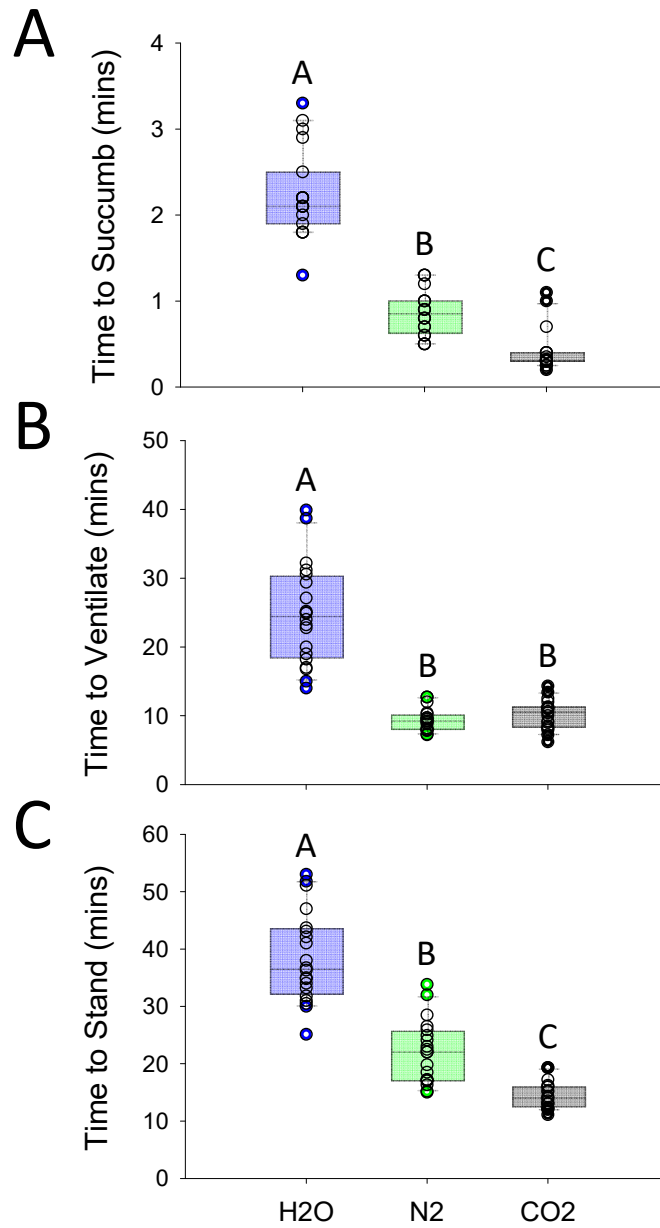

Figure 1 of Robertson and Van Dusen – Locust anoxia



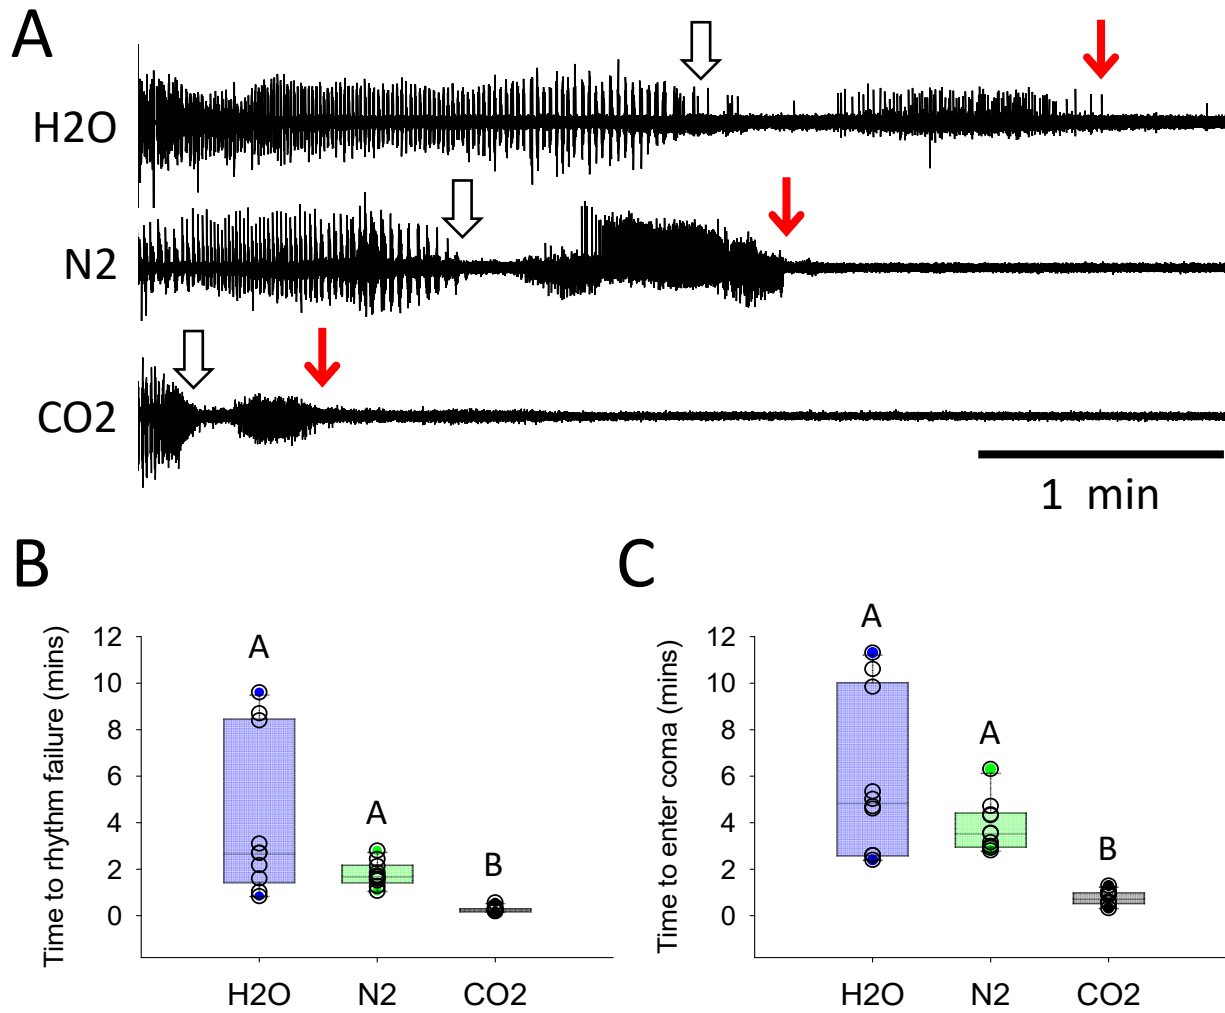

Figure 2 of Robertson and Van Dusen – Locust anoxia

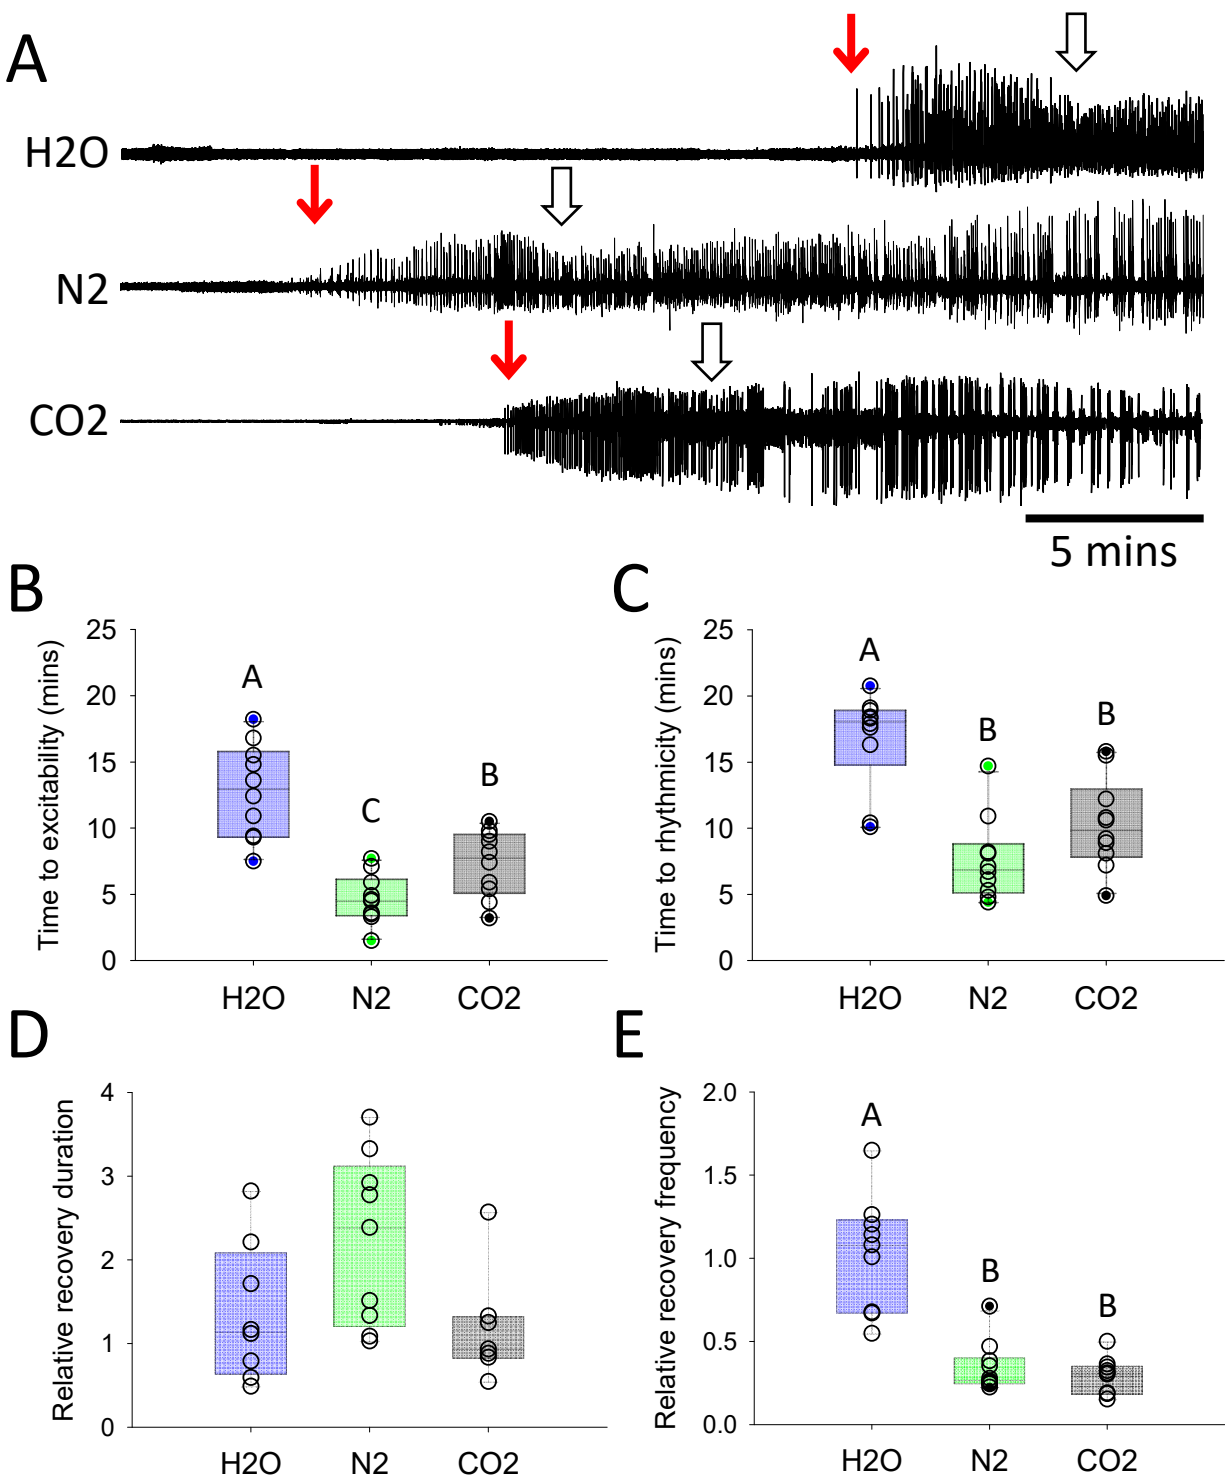

Figure 3 of Robertson and Van Dusen – Locust anoxia

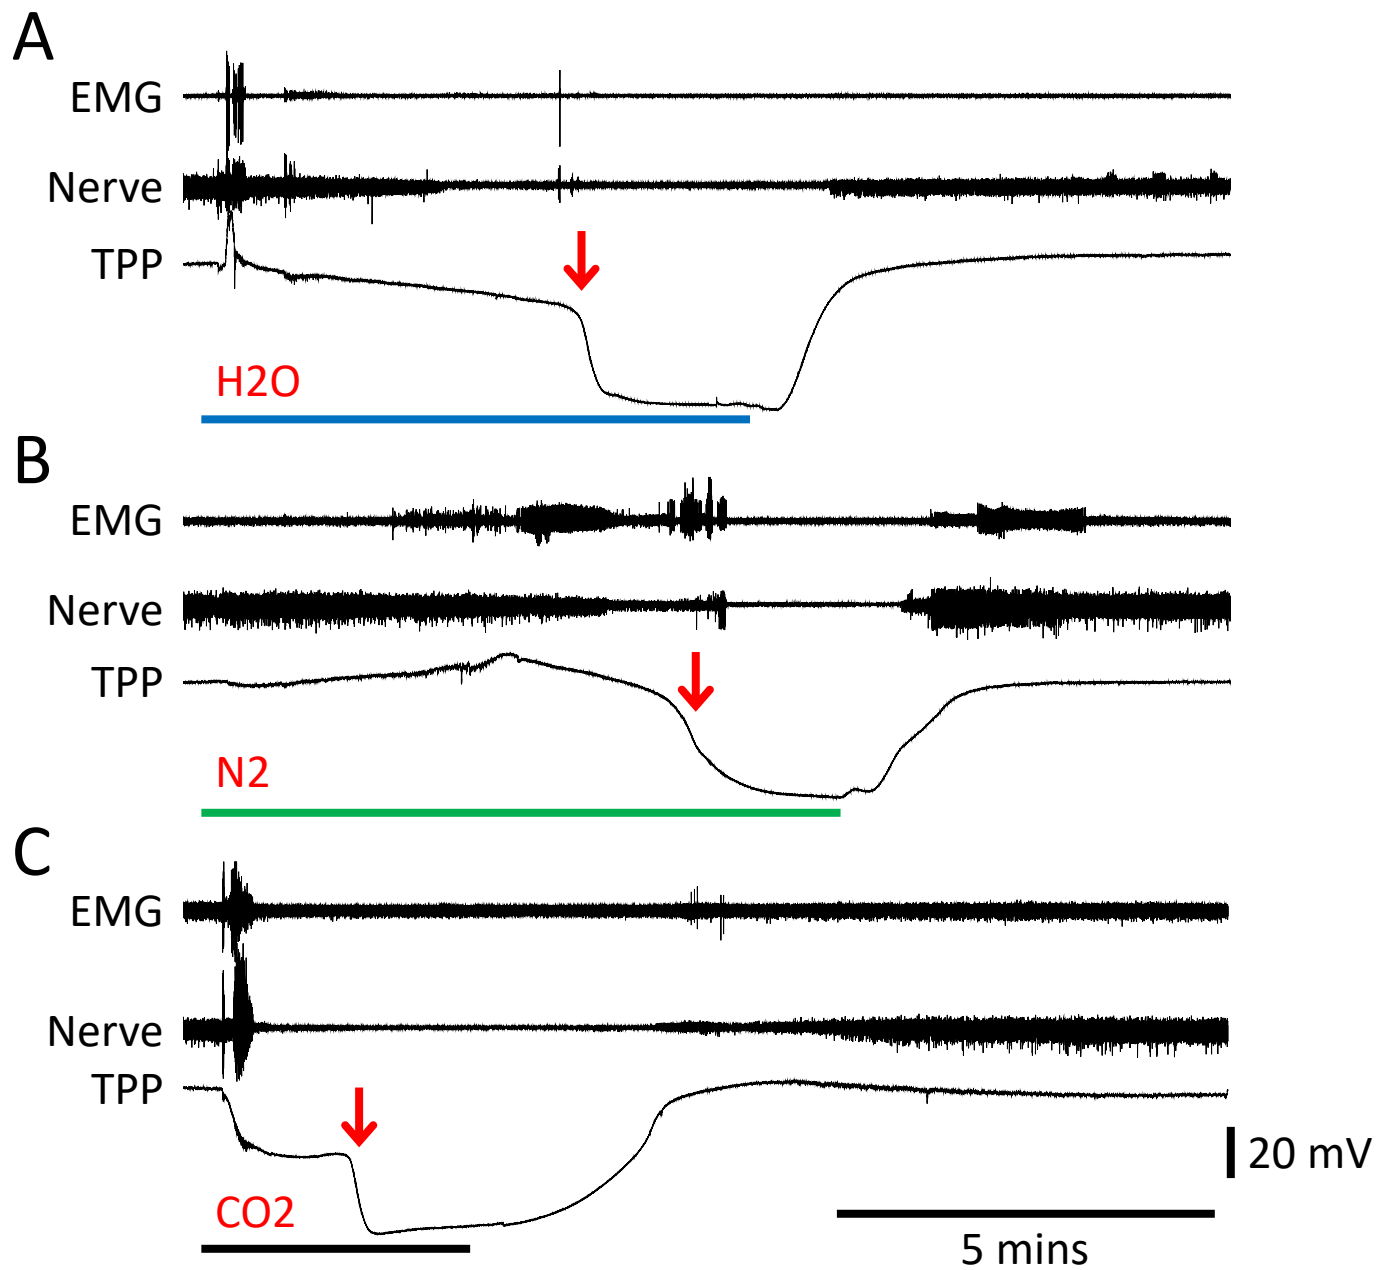

Figure 4 of Robertson and Van Dusen – Locust anoxia

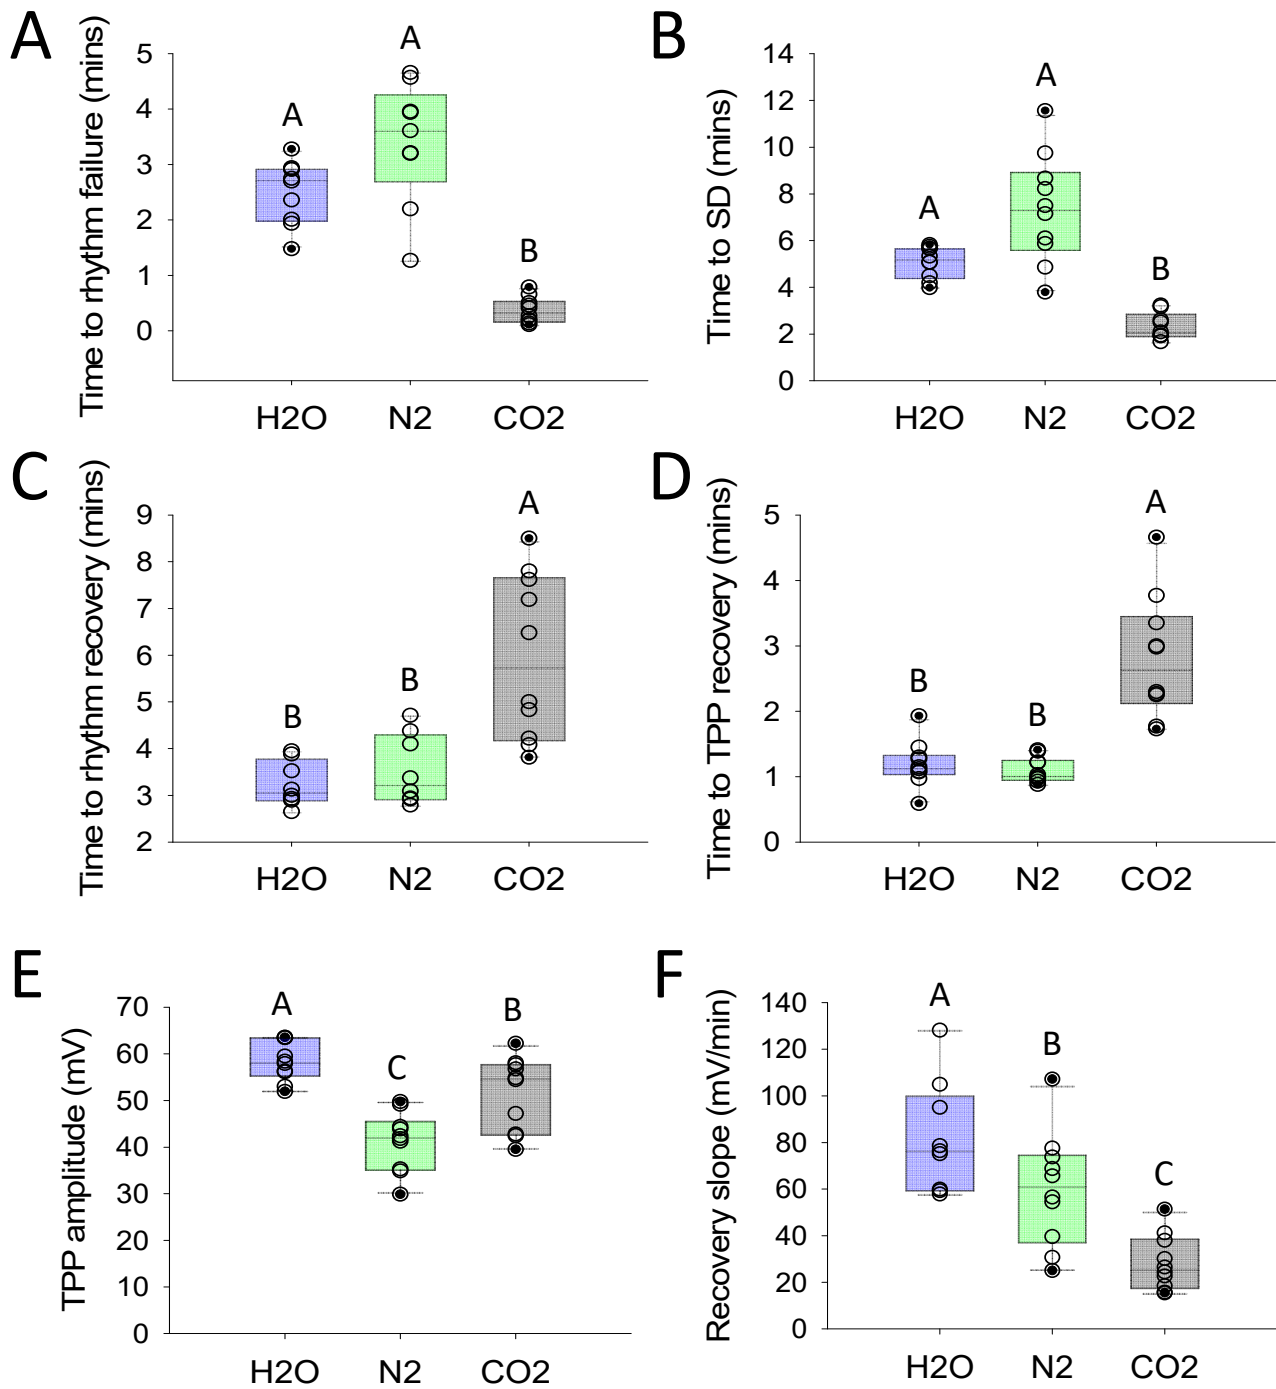

Figure 5 of Robertson and Van Dusen – Locust anoxia

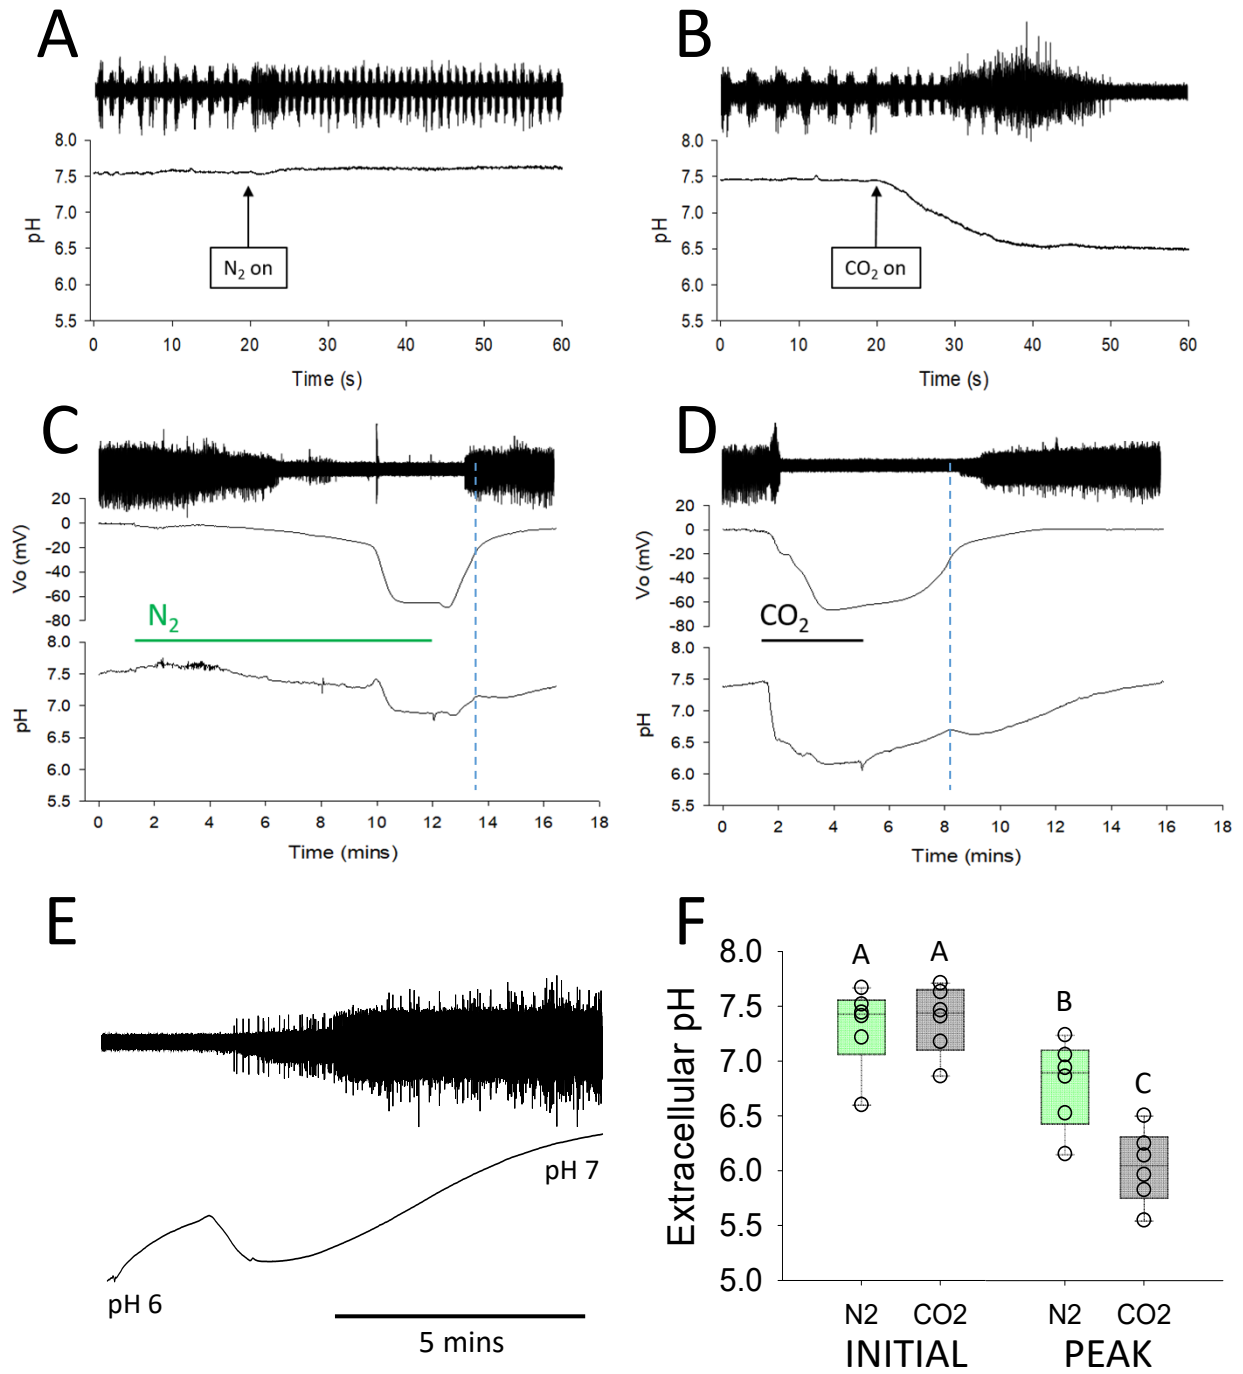

Figure 6 of Robertson and Van Dusen – Locust anoxia

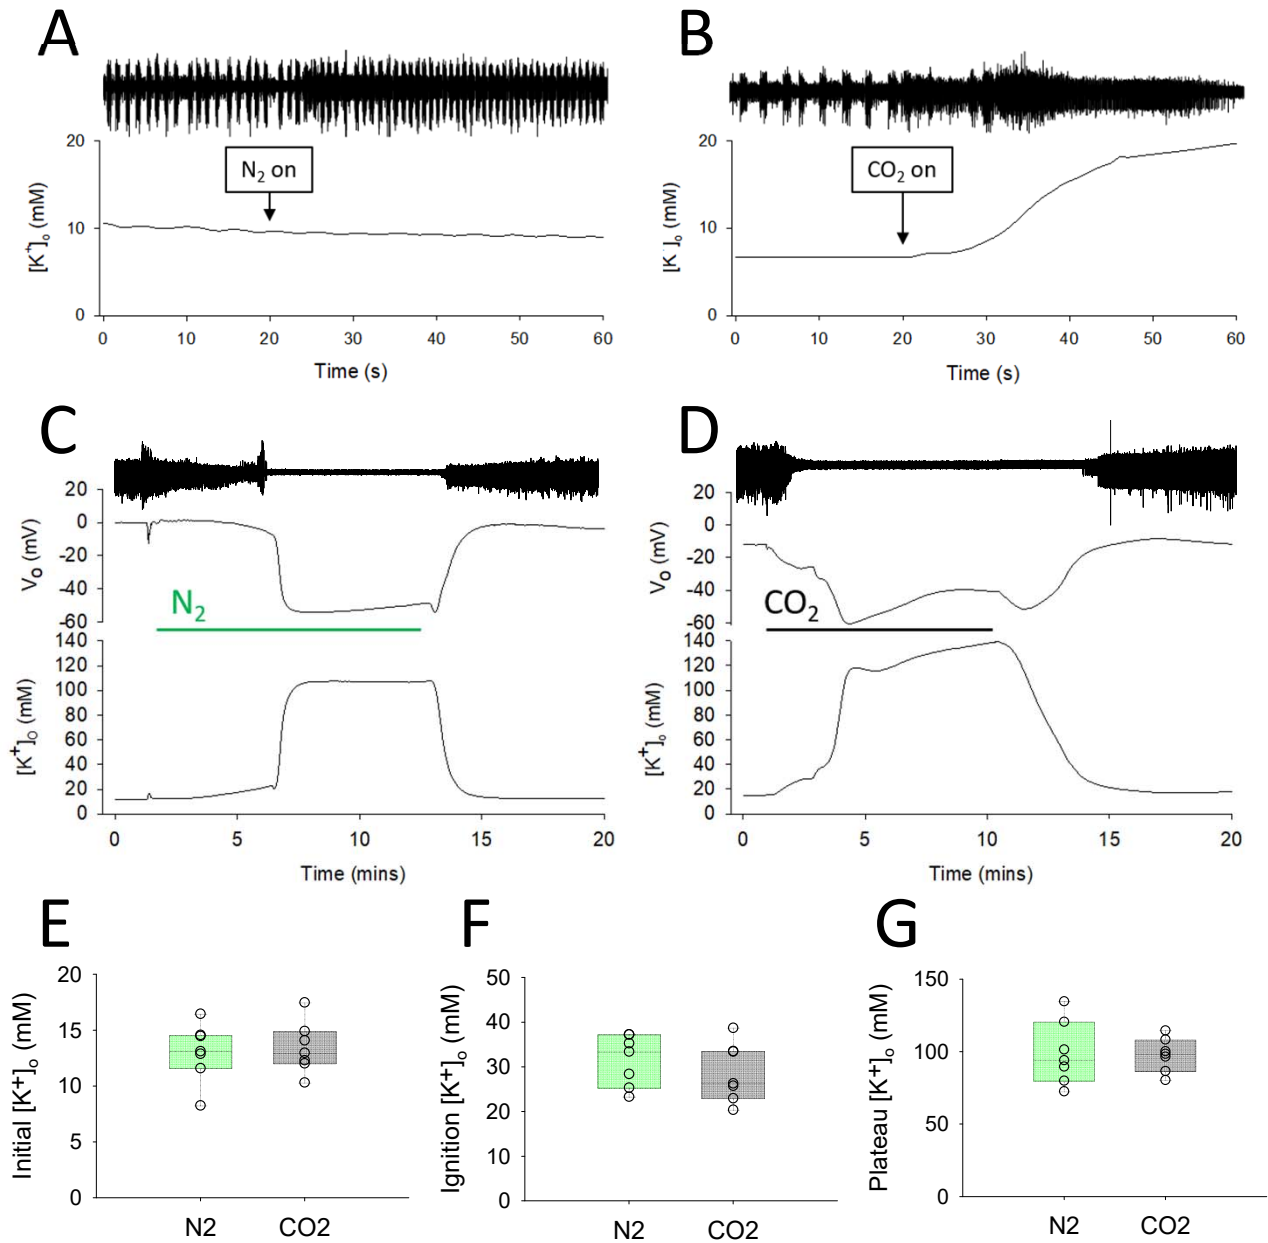

Figure 7 of Robertson and Van Dusen – Locust anoxia

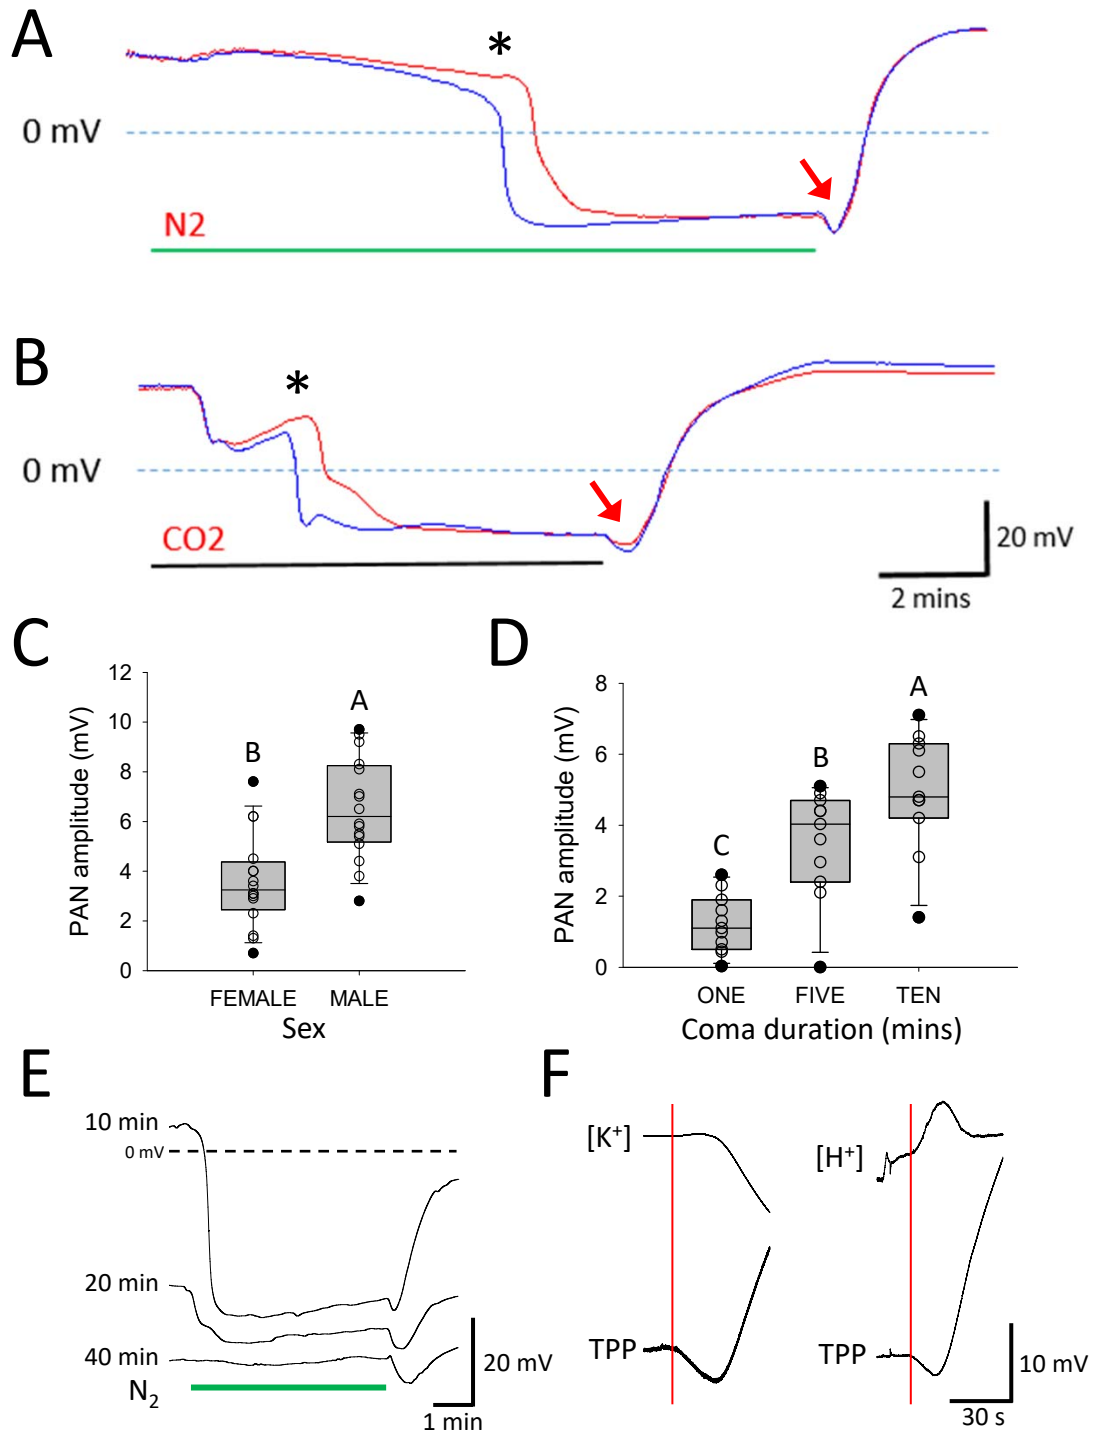

Figure 8 of Robertson and Van Dusen – Locust anoxia

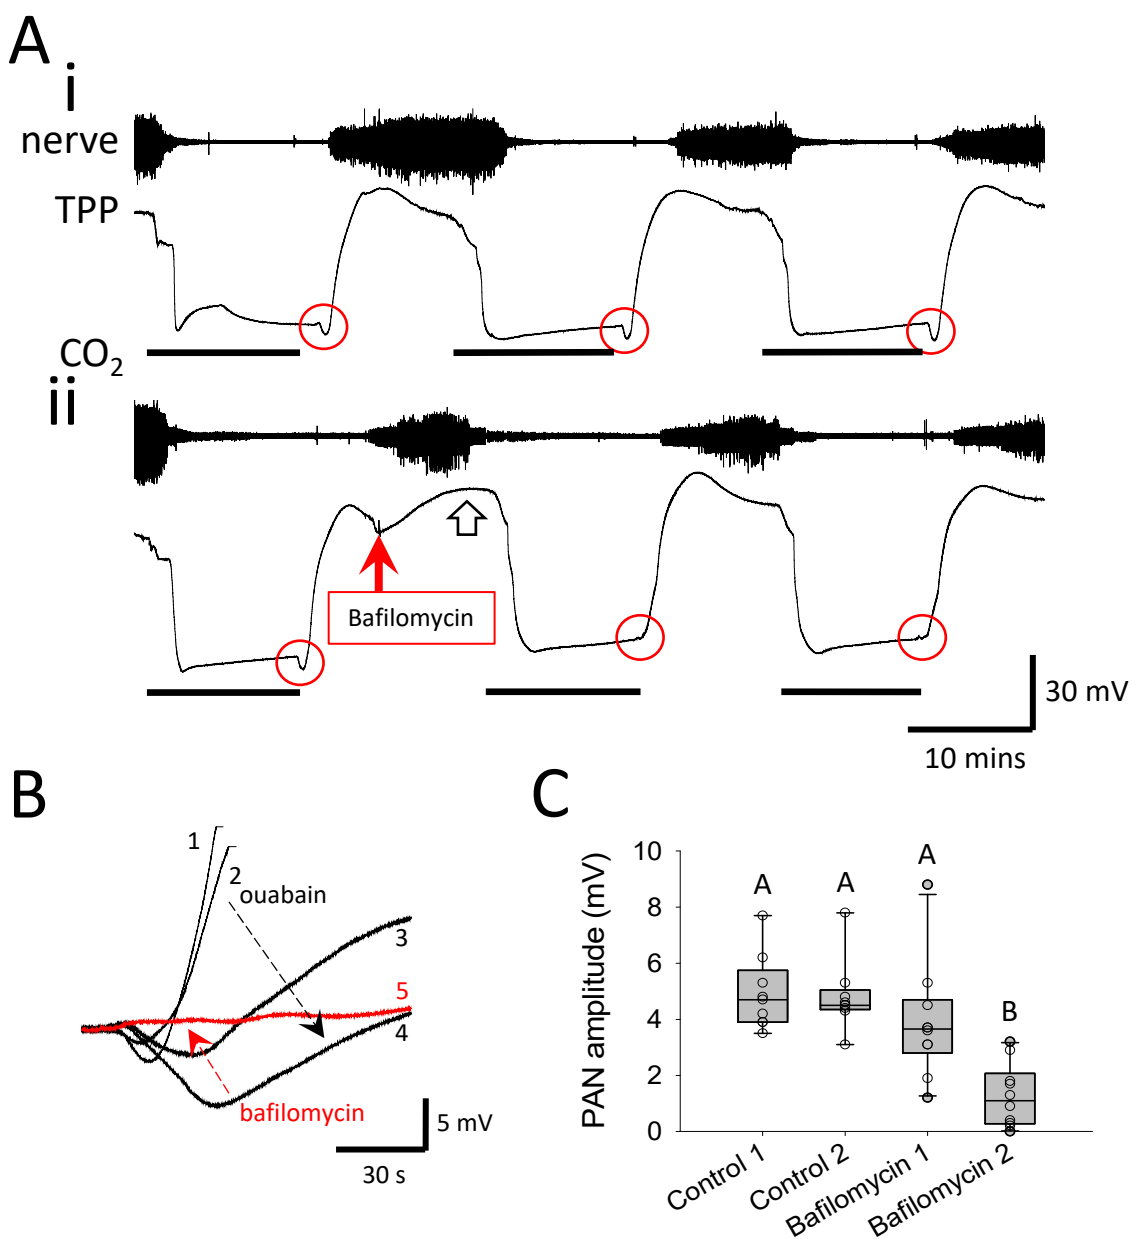

Figure 9 of Robertson and Van Dusen – Locust anoxia



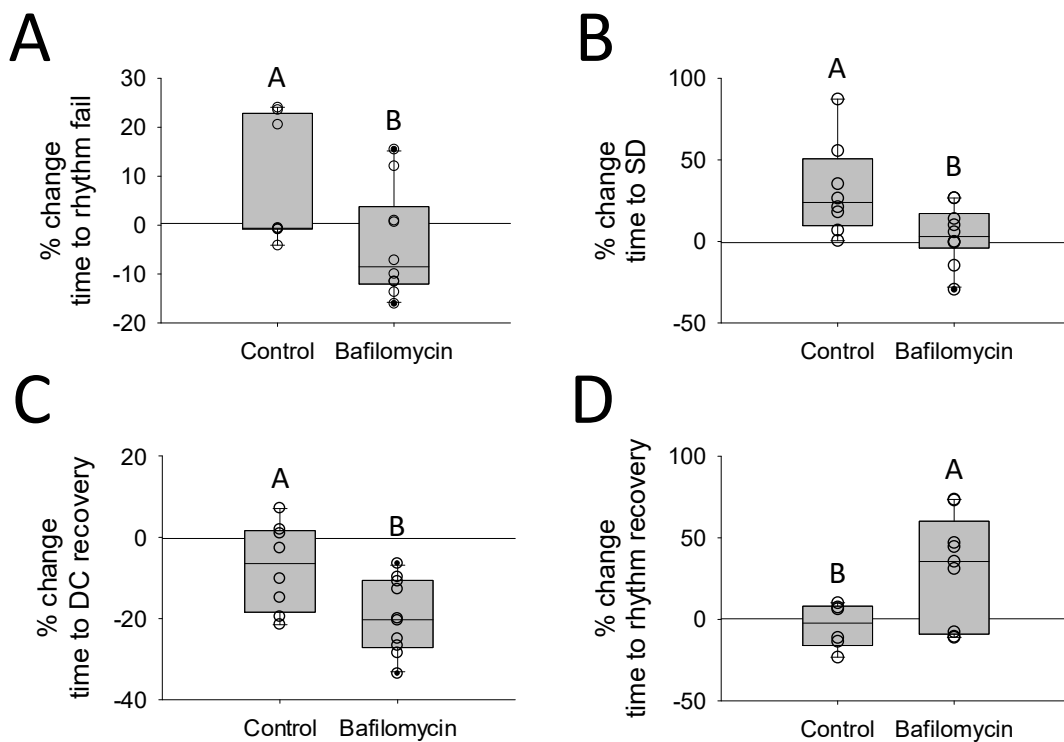

Figure 10 of Robertson and Van Dusen – Locust anoxia

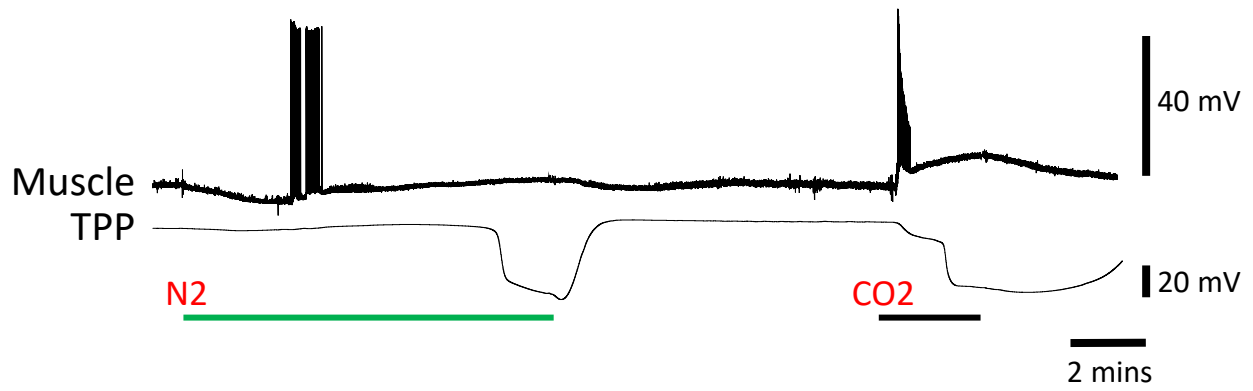

Figure 11 of Robertson and Van Dusen – Locust anoxia

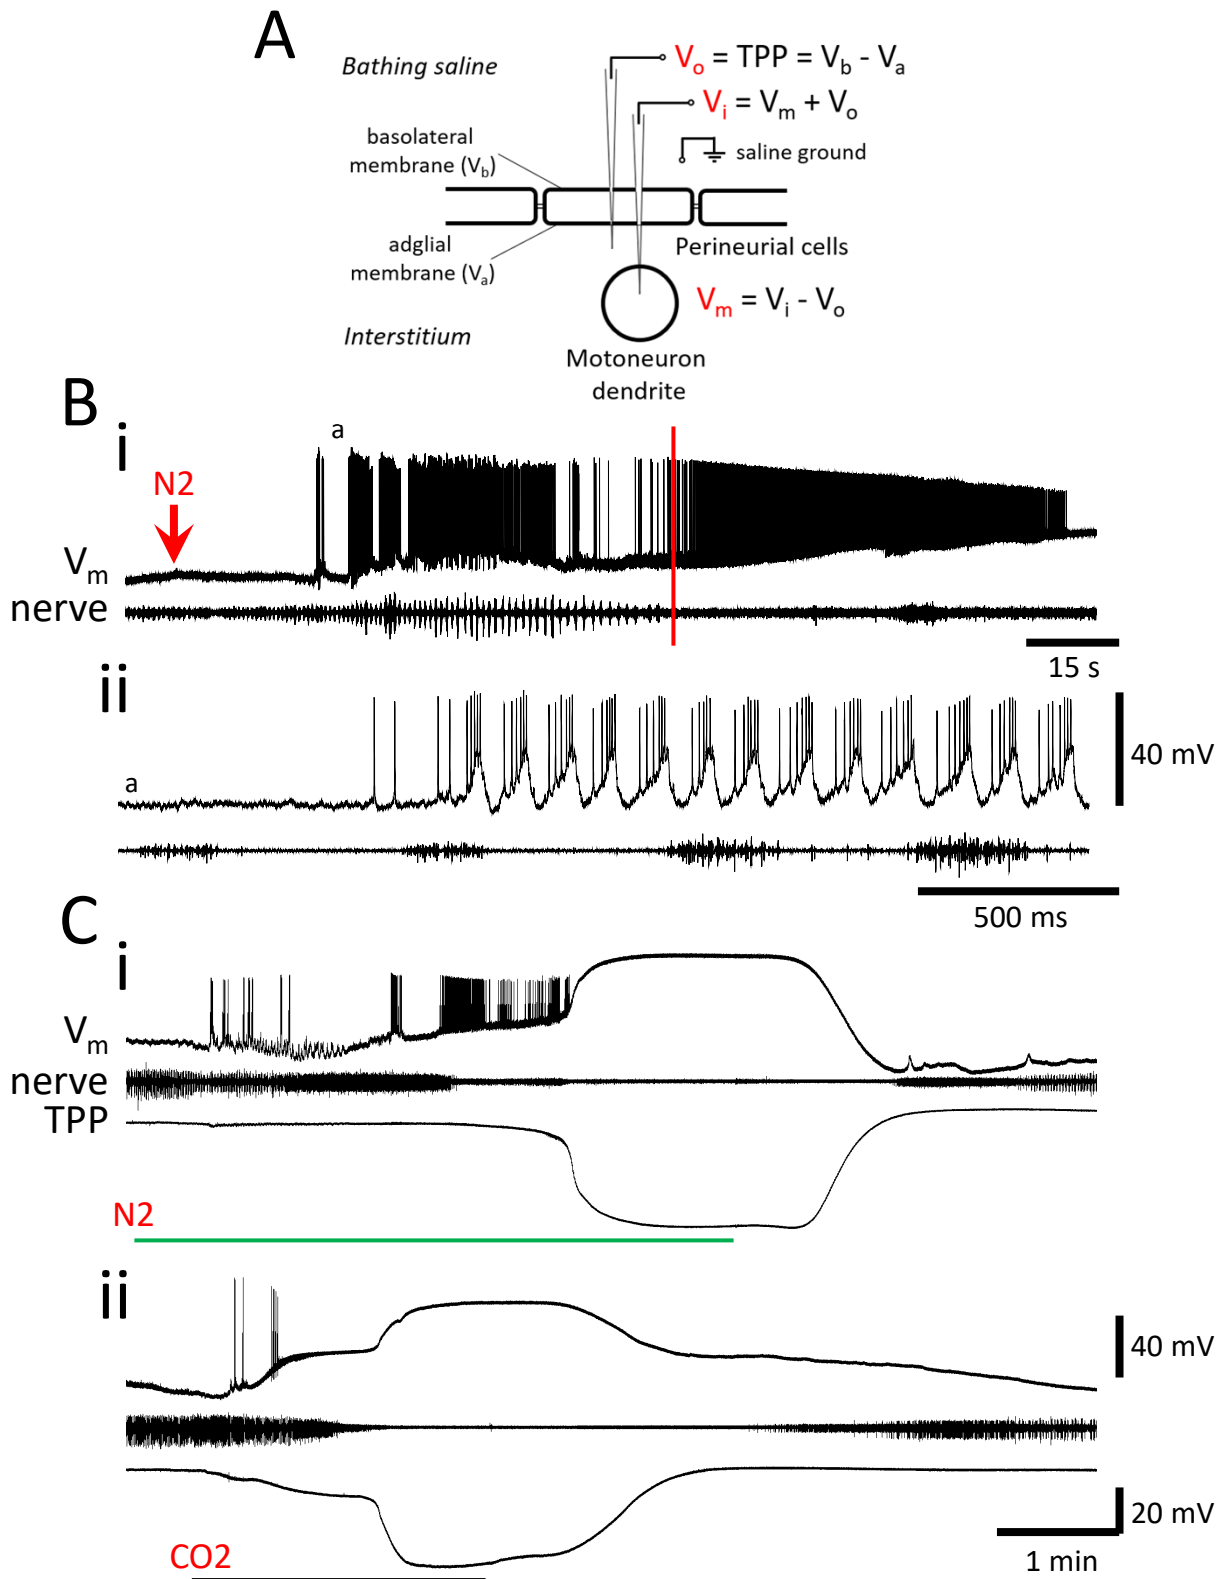

Figure 12 of Robertson and Van Dusen – Locust anoxia

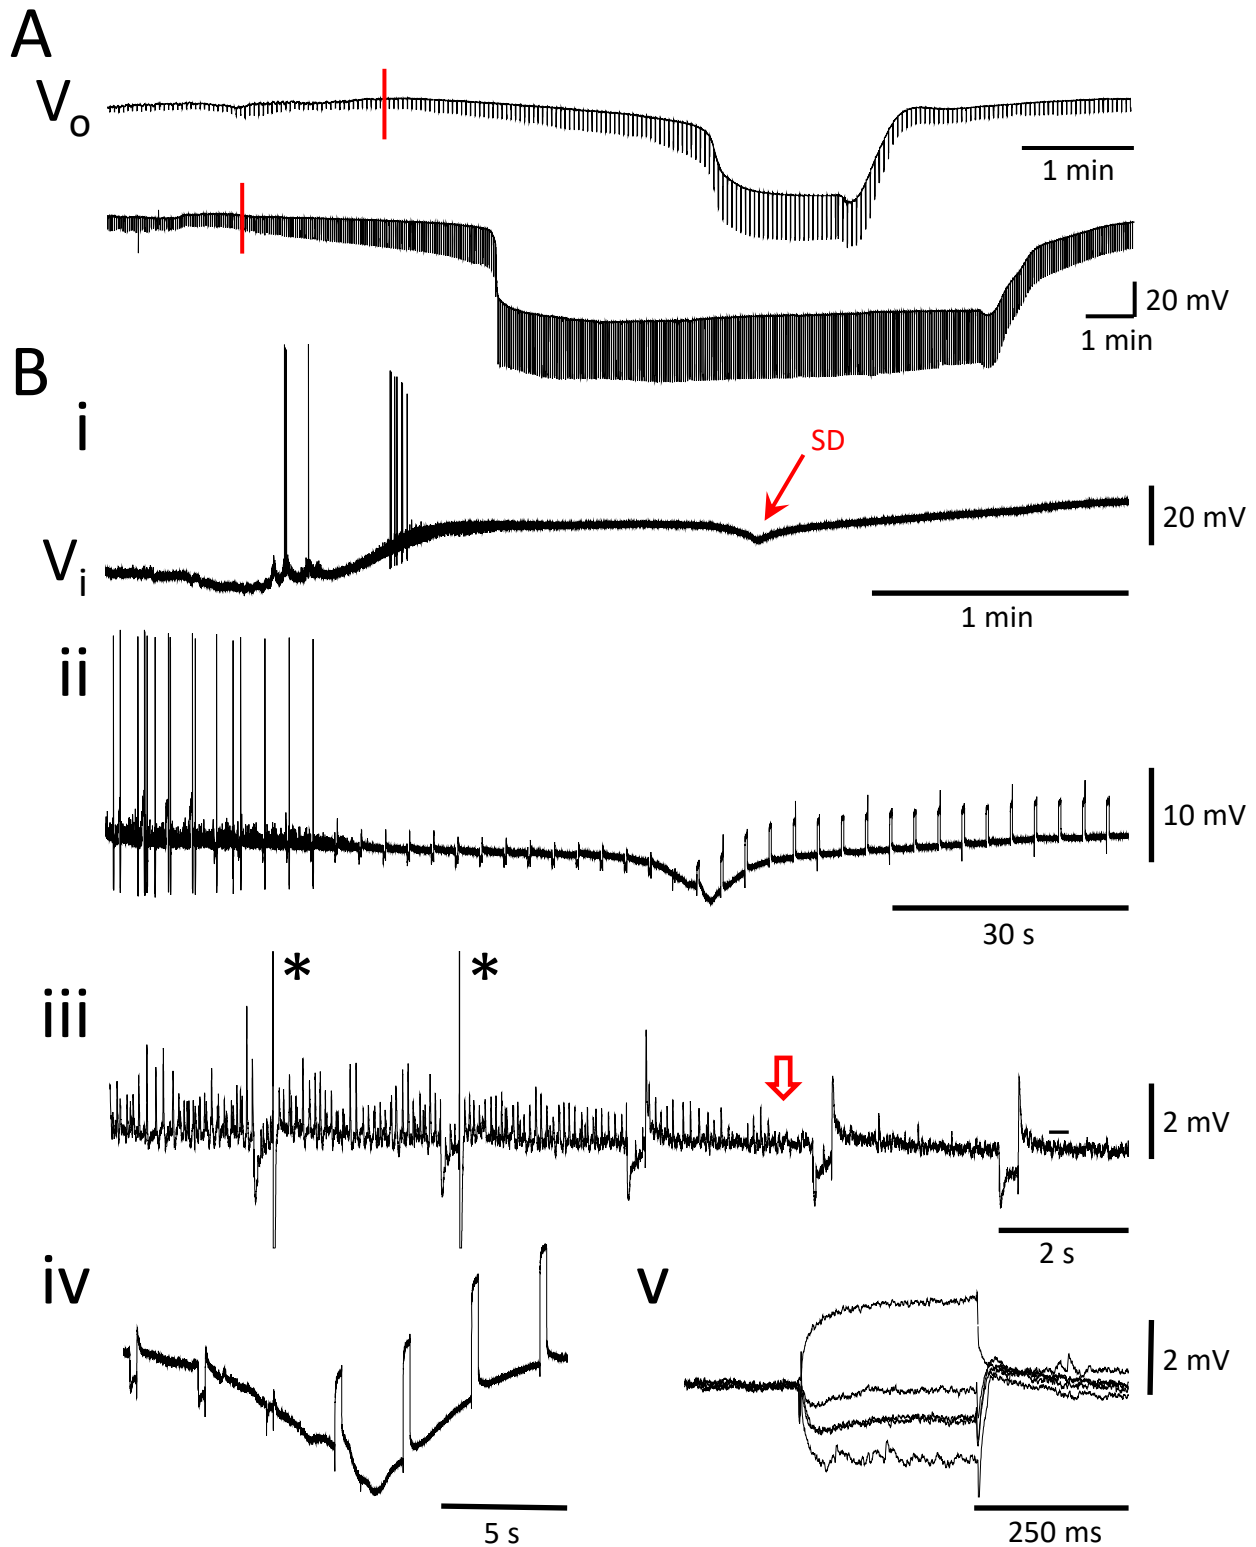

Figure 13 of Robertson and Van Dusen – Locust anoxia
